# Supplementary material
Source: PubMed Central journal article supplement (PMC5948139)
Supplement: NIHMS938025-supplement-1.pdf [file NIHMS938025-supplement-1.pdf]

## Online supplementary figure legends

**Supplementary Figure 1. *Trip8b* germline knockout (KO) mice have increased dentate gyrus neurogenesis and dendritic morphology relative to wild type (WT) mice. (a)** Photomicrographs of dentate gyrus subgranular zone Ki67-immunoreactive (+) cells in WT and KO littermates. **(b, c)** Proliferating Ki67+ DG cell number does not differ among groups **(b, one-way ANOVA,  $F_{2,17}=2.106$ ,  $p>0.05$ )**, but KO mice have more Ki67+ cells in posterior DG (coronal section Bregma -4.12 mm) vs. WT and Het (heterozygous; **c, two-way ANOVA, genotype [ $F_{2,221}=5.753$ ,  $p<0.01$ ]; Bregma [ $F_{12,221}=28.39$ ,  $p<0.0001$ ]; genotype X Bregma [ $F_{24,221}=1.254$ ,  $p>0.05$ ]; posthoc, WT vs. KO:  $a$   $p<0.05$ ,  $a'$   $p<0.01$ , KO vs. Het:  $b$   $p<0.05$ ,  $b'$   $p<0.01$ ). **(d)** Photomicrographs of dentate gyrus subgranular zone DCX+ cells in WT and KO littermates. **(e, f)** KO mice have more DCX+ DG cells **(e)** and more DCX+ cells in the posterior DG **(f)** vs. WT and Het **(e, one-way ANOVA,  $F_{2,17}=11.84$ ,  $***p<0.001$ , posthoc,  $**p<0.01$ ; f, two-way ANOVA, genotype [ $F_{2,221}=10.09$ ,  $p<0.0001$ ]; Bregma [ $F_{12,221}=20.54$ ,  $p<0.0001$ ]; genotype X Bregma [ $F_{24,221}=0.9315$ ,  $p>0.05$ ]; posthoc, WT vs. KO:  $a$   $p<0.05$ ,  $a'$   $p<0.01$ , KO vs. Het:  $b$   $p<0.05$ ,  $b'$   $p<0.01$ ). Scale bars **(a)**=200  $\mu$ m, applies **(a, d)**,  $n=6-7$ /group. **(g)** Reconstruction of soma/dendritic tree of representative DG DCX+ neurons in WT and KO mice. Scale bar **(g)**=10  $\mu$ m. **(h-j)** DCX+ DG granule cell layer (GCL) neurons in KO mice have longer dendrites **(h)** and more nodes **(i)** and ends **(j)** vs. WT (t-test,  $****p<0.0001$ ; **h-j**). **(k-m)** Many measures of dendritic maturation were greater in the posterior DG of KO vs. WT mice, with only length being greater in the anterior DG. **(k)** Dendritic length analysis by anterior vs. posterior Bregma level (two-way ANOVA, genotype [ $F_{1,97}=35.13$ ,  $p<0.0001$ ]; Bregma level [ $F_{1,97}=0.2498$ ,  $p>0.05$ ]; genotype X Bregma level [ $F_{1,97}=5.2$ ,  $p<0.05$ ]; posthoc, KO Bregma level vs. WT Bregma level:  $*p<0.05$ ,  $****p<0.0001$ ). **(l)** Dendritic node by anterior vs. posterior Bregma level (two-way ANOVA, genotype [ $F_{1,97}=35.01$ ,  $p<0.0001$ ]; Bregma [ $F_{1,97}=0.2367$ ,  $p>0.05$ ]; genotype X Bregma [ $F_{1,97}=8.723$ ,  $p<0.01$ ]; posthoc, KO Bregma level vs. WT Bregma level:  $****p<0.0001$ ). **(m)** Dendritic end number by anterior vs. posterior Bregma level (two-way ANOVA, genotype [ $F_{1,97}=35.73$ ,  $p<0.0001$ ]; Bregma [ $F_{1,97}=0.2048$ ,  $p>0.05$ ]; genotype X Bregma [ $F_{1,97}=8.475$ ,  $p<0.01$ ], posthoc, KO Bregma level vs. WT Bregma level:  $****p<0.0001$ ).  $n=18-21$****

neurons/animal, 3 animals/group in each bar. Mean $\pm$ SEM shown (**b-c, e-f, h-m**) with data points from individual animals (**b, e**) or cells (**h-m**) overlaid. See **Supplementary Table 1** and the **Life Sciences Reporting Summary** for detailed statistical information.

**Supplementary Figure 2. Brain protein expression pattern of TRIP8b. (a-h)** Photomicrographs of coronal brain sections from WT (**a-d**) and *Trip8b* germline KO littermate mice (**e-h**) processed for TRIP8b immunohistochemistry (red). **(a)** Low magnification view of TRIP8b immunoreactivity in a coronal brain section of WT mice, with dotted squares indicating regions presented in higher magnification in **(b)** and **(d)**. **(b)** In WT mice, TRIP8b is expressed in cell bodies of the cerebral cortex (Ctx), particularly in layer V cell bodies and layers I-IV proximal and distal compartments of apical dendrites. **(c)** In WT mice, TRIP8b is also expressed in cell bodies of the entorhinal cortex (Ent) layers II/III and V, and in Ent terminals in layer VI. **(d)** In WT mice, TRIP8b was also expressed in the hippocampal pyramidal cell layer (SP), stratum lacunosum-moleculare (SLM) and DG molecular layer (Mol). However, TRIP8b<sup>+</sup> cell bodies were rarely detected in the DG granular cell layer (GCL). In contrast to the expression of TRIP8b<sup>+</sup> cell bodies and processes in WT mice (**a-d**), TRIP8b immunoreactivity was not evident in the brains of germline KO mice (**e-h**). Dotted squares in **(e)** indicate regions presented in higher magnification in **(f)** and **(h)**. **(i)** Ctx, cortex; Ent, entorhinal cortex; DG, dentate gyrus; GCL, granule cell layer; Mol, molecular layer; SO, stratum oriens; SP, stratum pyramidale; SR, stratum radiatum; SLM, stratum lacunosum moleculare. Scale bars **(a)**=1mm applies **(a, e)**; **(b)**=200  $\mu$ m applies **(b-d, f-h)**. See **Online Methods** and the **Life Sciences Reporting Summary** for detailed experimental information.

**Supplementary Figure 3. TRIP8b isoform levels, body weight, and adrenal gland weights in susceptible, resilient, and control groups after chronic social defeat stress (CSDS).** See Fig. 1 in main text for timeline of experiment. **(a-e)** Whole blot images with antibodies against IsoA4 **(a)**,

GAPDH (**b, e**), IsoA5 (**c**) and total TRIP8b (**d**). After transferring proteins from gel to nitrocellulose membrane, membranes were horizontally cut to enable immunoblotting for proteins (IsoA4, IsoA5, GAPDH, TRIP8b). Stripping and reprobing was used only for TRIP8b, as the membrane stained for IsoA5 antibody was stripped and the blot was then incubated with TRIP8b antibody. Molecular weight indicators do not transfer from membrane to film, and are hand-drawn post-hoc by laying developed film over membrane. Ladders in (**a-e**) have been added via Adobe Illustrator based on sharpie marks on film. (**f**) Breakdown of social interaction (SI) ratio of control, susceptible, and resilient mice (control: n=10, resilient: n=25, susceptible: n=13). (**g**) Body weight in control, susceptible, and resilient mice before and after CSDS (two-way RM ANOVA, group [ $F_{2,46}=0.1871$ ,  $p>0.05$ ]; day [ $F_{1,46}=55.84$ ,  $p<0.0001$ ]; Subjects [matching;  $F_{46, 46}=5.479$ ,  $p<0.0001$ ]; group X day [ $F_{2,46}=0.2031$ ,  $p>0.05$ ]; posthoc, Day 1 vs. Day 11: control  $p<0.01$ , susceptible  $p<0.01$ , resilient  $p<0.0001$ ), n=10-26/group. (**h**) Adrenal gland weight in control, susceptible, and resilient mice after CSDS. (**i-q**) Level of TRIP8b isoforms and total TRIP8b in the DG of mice in CSDS experiment. (**i**) IsoA4 in control, susceptible, and resilient mice DG (one-way ANOVA,  $F_{2,28}=2.628$   $p=0.09$ ). (**j**) Correlation of DG IsoA4 levels in susceptible mice to their SI ratio (linear regression,  $r^2=0.1061$ ,  $p>0.05$ , n=15). (**k**) Correlation of DG IsoA4 levels in resilient mice to their SI ratio (linear regression,  $r^2=0.6021$ ,  $*p<0.05$ , n=7) (**l**) IsoA5 in control, susceptible, and resilient mice DG (one-way ANOVA,  $F_{2,28}=0.01259$ ,  $p>0.05$ ). (**m**) Correlation of DG IsoA5 levels in susceptible mice to their SI ratio (linear regression,  $r^2=0.02063$ ,  $p>0.05$ , n=15) (**n**) Correlation of DG IsoA5 levels in resilient mice to their SI ratio (linear regression,  $r^2=1.026e-005$ ,  $p>0.05$ , n=7). (**o**) Total TRIP8b in control, Trip8b levels in susceptible mice to their SI ratio. (**p**) Correlation of DG TRIP8b levels in susceptible mice to their SI ratio (linear regression,  $r^2=0.003588$ ,  $p>0.05$ , n=15). (**q**) Correlation of DG TRIP8b levels in resilient mice to their SI ratio (linear regression,  $r^2=0.308$ ,  $p>0.05$ , n=7). (**i-q**) n=7-15/group. Mean $\pm$ SEM shown (**f-i, l, o**) with data points from individual animals overlaid (**f, h-q**). See **Supplementary Table 1** and the **Life Sciences Reporting Summary** for detailed statistical information.

**Supplementary Figure 4. TRIP8b knockdown efficiency *in vitro*, efficacy *ex vivo* in Ent slices, and *in vivo* EEG power analysis in control mice vs. Ent-infused TRIP8b shRNA mice. (a-b)**

Whole blot images with Iso1a-4 and GAPDH (a) and with total protein staining (b). (c-e) In *ex vivo* slice electrophysiology experiments, the resting membrane potential ( $V_{rest}$ ) was similar in the four Ent cell types sampled: TRIP8b shRNA EGFP-, TRIP8b shRNA EGFP+, SCR mRNA EGFP-, and SCR mRNA EGFP+ cells, as was peak (d) and steady-state (e) input-output analysis. Calibration (d)=200 msec, 10 mV applies (d, e). (c) one-way ANOVA,  $F_{3, 29}=0.6732$ ,  $p>0.05$ , (d) two-way RM ANOVA, Amp [ $F_{8, 232}=86.1$ ,  $p<0.0001$ ]; virus [ $F_{3, 29}=1.264$ ,  $p>0.05$ ]; Amp X virus [ $F_{24, 232}=3.683$ ,  $p<0.0001$ ], subject [matching;  $F_{29, 32}=3.683$ ,  $p<0.0001$ ], TRIP8b shRNA EGFP- vs. SCR shRNA EGFP+: Amp posthoc  $a'''$   $p<0.0001$ ; TRIP8b shRNA EGFP+ vs. SCR shRNA EGFP+:  $b'''$   $p<0.0001$ ; SCR shRNA EGFP- vs. SCR shRNA EGFP+:  $c'''$   $p<0.0001$ , (e) two-way RM ANOVA, Amp [ $F_{8, 232}=332.7$ ,  $p<0.0001$ ]; virus [ $F_{3, 29}=1.296$ ,  $p>0.05$ ]; Amp X virus [ $F_{24, 232}=1.048$ ,  $p>0.05$ ], subject [matching;  $F_{29, 32}=25.87$ ,  $p<0.0001$ ];  $n=11$  TRIP8b shRNA EGFP-, 5 TRIP8b shRNA EGFP+, 13 SCR shRNA EGFP-, 4 SCR shRNA EGFP-. (f-g) In *in vivo* EEG analysis, power value for all analyzed waves (delta, theta, alpha, beta, gamma) was similar in control (SCR shRNA) and TRIP8b shRNA Ent KD mice both during the day (f) and the night (g). (f) two-way ANOVA, bands [ $F_{4, 30}=61.95$ ,  $p<0.0001$ ]; virus [ $F_{1, 30}=0.3025$ ,  $p>0.05$ ]; bands X virus [ $F_{4, 30}=0.07033$ ,  $p>0.05$ ], (g) two-way ANOVA, bands [ $F_{4, 30}=42.28$ ,  $p<0.0001$ ]; virus [ $F_{1, 30}=0.08503$ ,  $p>0.05$ ]; bands X virus [ $F_{4, 30}=0.059$ ,  $p>0.05$ ];  $n=4$  SCR shRNA, 4 TRIP8b shRNA). Mean $\pm$ SEM shown (c-g) with data points from individual cells (c) or animals (f, g) overlaid. See **Supplementary Table 1** and the **Life Sciences Reporting Summary** for detailed statistical information.

**Supplementary Figure 5. Target specificity of viral-mediated gene transfer in Ent-infused shRNA mice. (a-h)** Nine weeks after bilateral Ent stereotaxic infusions of AAV-SCR EGFP or AAV-

TRIP8b EGFP, GFP+ cell bodies were detected in the lateral and medial Ent (lEnt, **a**; mEnt, **b**), and GFP+ terminals were detected in the outer molecular layer (Mol) of the DG (**c**, **g**), the middle Mol of DG (**d**), or both middle and outer Mol DG (**e**). GFP staining was not detected in the subiculum (Sub) (**f**), CA3 (**g**), or amygdala (Amyg; **h**) in any animal whose cellular or behavior data are presented in the main text. Dotted lines in (**c-e**, **g**) delineates DG GCL, in (**f**) outlines subiculum, and in (**h**) outlines amygdala. Scale bar (**a**)=200 um applies (**a-h**). (**i-k**) After the termination of each behavioral experiment, a few animals were identified whose bilateral infusions were off target, with terminals evident in other brain or hippocampal regions (e.g. CA1, CA2/3, or CA3). As shown in (**i-k**), animals with “off target” infusions (either uni or bilateral off targets; red bars) had distinct behavior in the FST, with “on target” mice (terminals evident in Mol of DG but not in other brain or hippocampal regions) showing less total immobile time vs. controls, and “off target” mice performing similar to controls (One-way ANOVA, (**i**)  $F_{2,17}=3.629$ ,  $p=0.0487$ : posthoc \*\* $p<0.01$ , \*\*\* $p<0.001$ ;  $n=8$  SCR shRNA, 10 TRIP8b shRNA, 2 TRIP8b shRNA off-target, (**j**)  $F_{2,19}=11.7$ ,  $p=0.0005$ : posthoc \* $p<0.05$ ;  $n=10$  SHAM/SCR shRNA, 8 SHAM/TRIP8b shRNA, 4 SHAM/TRIP8b shRNA off-target, (**k**)  $F_{3,24}=2.631$ ,  $p=0.0732$ : posthoc \* $p<0.05$ ;  $n=8$  VEH/SCR shRNA, 8 CORT/SCR shRNA, 8 CORT/TRIP8b shRNA, 4 CORT/TRIP8b shRNA off-target). Amygdala, amyg; Ent, entorhinal cortex; GCL, granule cell layer; Mol, molecular layer; SP, stratum pyramidale; SR, stratum radiatum; SLM, stratum lacunosum moleculare; Sub, subiculum. Mean $\pm$ SEM shown with data points from individual animals (**i-k**) overlaid. See **Supplementary Table 1** and the **Life Sciences Reporting Summary** for detailed statistical information.

**Supplementary Figure 6. Ent-infused TRIP8b shRNA mice have similar number of dentate gyrus type-1 radial glial-like cells as control mice. (a)** Representative image of GFP+ type-1 cells in the DG SGZ. Scale bar (**a**)=25um. (**b**, **c**) Stereological assessment of type-1 radial glial-like cell number in the total DG SGZ (**b**) or according to distance from Bregma (**c**) 4 weeks after Ent infusion

of SCR vs. TRIP8b shRNA. **(b)** Unpaired t-test,  $p>0.05$ , **(c)** two-way ANOVA, virus [ $F_{1, 195}=0.02218$ ,  $p>0.05$ ]; Bregma [ $F_{14, 195}=34.61$ ,  $p<0.0001$ ]; virus X Bregma level [ $F_{14, 195}=0.3688$ ,  $p>0.05$ ], SCR shRNA:  $n=8$ , TRIP8b shRNA:  $n=7$ . Mean $\pm$ SEM shown **(b-c)** with data points from individual animals **(b)** overlaid. See **Supplementary Table 1** and the **Life Sciences Reporting Summary** for detailed statistical information.

### **Supplementary Figure 7. Image-guided irradiation-induced ablation of dentate gyrus**

#### **neurogenesis prevents Ent-infused TRIP8b shRNA-induced reduction in forced swim test**

**(FST) immobility time. (a-b)** One week post-bilateral Ent AAV-infusion, SCR shRNA and TRIP8b shRNA mice received either sham (SHAM) or image-guided DG-targeted irradiation (IRR) to ablate neurogenesis. Five weeks later, when DCX+ cells were still depleted (**Fig. 3**, main text), groups did not differ in LM activity [**(a)** two-way ANOVA, treatment [ $F_{1, 43}=0.464$ ,  $p>0.05$ ]; virus [ $F_{1, 43}=0.06712$ ,  $p>0.05$ ]; treatment X virus [ $F_{1, 43}=0.3056$ ,  $p>0.05$ ];  $n= 20$  SHAM/SCR shRNA, 8 SHAM/TRIP8b shRNA, 10 IRR/SCR shRNA, 9 IRR/TRIP8b)]. **(b)** AAV-TRIP8b shRNA Ent infusion decreased FST immobile time in SHAM mice, but not in IRR mice (two-way ANOVA, treatment [ $F_{1, 44}=3.29$ ,  $p>0.05$ ]; virus [ $F_{1, 44}=10.33$ ,  $p<0.01$ ]; treatment X virus [ $F_{14, 195}=2.044$ ,  $p>0.05$ ]; Fisher's LSD: \* $p<0.05$ , \*\* $p<0.01$ ;  $n= 20$  SHAM/SCR shRNA, 8 SHAM/TRIP8b shRNA, 10 IRR/SCR shRNA, 10 IRR/TRIP8b). Mean $\pm$ SEM shown with data points from individual animals overlaid. See **Supplementary Table 1** and the **Life Sciences Reporting Summary** for detailed statistical information.

### **Supplementary Figure 8. Ent TRIP8b knockdown (KD) promotes antidepressive-like behaviors**

**under conditions that mimic chronic stress. (a,b)** Beginning one week post-bilateral Ent AAV-infusion, mice received vehicle (VEH) or corticosterone (CORT) via drinking water. Four weeks post-infusion, mice were tested for locomotion, novelty suppressed feeding (NSF, **a**), and forced swim test (FST, **b**). While Ent TRIP8b shRNA mice that received VEH had similar latency to feed in NSF with

Ent SCR shRNA mice that received VEH, Ent SCR shRNA mice that received CORT have longer latency to feed compared to any group that received VEH. TRIP8b shRNA mice that treated with CORT have shorten latency to feed compared to SCR shRNA mice that treated with CORT ((a) two-way ANOVA, treatment [ $F_{1,40}=2.925$ ,  $p>0.05$ ]; virus [ $F_{1,40}=2.925$ ,  $p>0.05$  ( $p=0.0648$ )]; treatment X virus [ $F_{1,40}=1.882$ ,  $p>0.05$ ]; virus posthoc \* $p<0.05$ ;  $n= 18$  VEH/SCR shRNA, 7 VEH/TRIP8b shRNA, 8 CORT/SCR shRNA, 11 CORT/TRIP8b). Ent-infused TRIP8b shRNA mice that received VEH have shortest immobility time in FST compared to all the other group. TRIP8b shRNA that received CORT have shorter immobility time SCR shRNA that received CORT not TRIP8b shRNA that received VEH ((b) two-way ANOVA, treatment [ $F_{1,63}=11.14$ ,  $p<0.01$ ]; virus [ $F_{1,63}=11.64$ ,  $p<0.01$ ]; CORT X shRNA [ $F_{1,63}=0.4073$ ,  $p>0.05$ ]; virus posthoc \* $p<0.05$ , \*\*\* $p<0.001$ ;  $n= 25$  VEH/SCR shRNA, 7 VEH/TRIP8b shRNA, 16 CORT/SCR shRNA, 19 CORT/TRIP8b). Mean $\pm$ SEM shown with data points from individual animals overlaid. See **Supplementary Table 1** and the **Life Sciences Reporting Summary** for detailed statistical information.

**Supplementary Figure 9. Ent TRIP8b knockdown (KD) under conditions that mimic chronic stress does not change performance on other anxiety- or depressive-like behavioral tests.**

Beginning one week post-bilateral Ent AAV-infusion, mice received vehicle (VEH) or corticosterone (CORT) via drinking water. Mice were tested for elevated plus maze (EPM, **a-d**) five weeks post infusion and for splash test (**e, f**) nine weeks post infusion. (**a-d**) Ent TRIP8b shRNA mice which receive CORT do not show difference in entries or duration in open arms (**a-b**) or closed arms (**c-d**) of EPM test compared to SCR shRNA mice which received either VEH or CORT ((a) One-way ANOVA,  $F_{2,48}=1.521$ ,  $p>0.05$ , (b) One-way ANOVA,  $F_{2,48}=0.4123$ ,  $p>0.05$ , (c) One-way ANOVA,  $F_{2,48}=0.4673$ ,  $p>0.05$ , (d)  $F_{2,48}=0.2527$ ,  $p>0.05$ ;  $n= 16$  SCR/VEH, 16 SCR/CORT, 19 TRIP8b/CORT). (**e-f**) Ent TRIP8b shRNA mice which receive CORT do not show any difference in grooming frequency (**e**) or total duration of grooming (**f**) compared to SCR shRNA mice which received either VEH or CORT ((e)

One-way ANOVA,  $F_{2,45}=0.5624$ ,  $p>0.05$ , **(f)** One-way ANOVA,  $F_{2,45}=1.474$ ,  $p>0.05$ ;  $n=16$  SCR/VEH, 14 SCR/CORT, 18 TRIP8b/CORT). Mean $\pm$ SEM shown with data points from individual animals overlaid. See **Supplementary Table 1** and the **Life Sciences Reporting Summary** for detailed statistical information.

**Supplementary Figure 10. Target specificity of viral-mediated gene transfer in Ent-infused mCherry and DREADD mice. (a-h)** Ten weeks after stereotaxic infusions of AAV-dio-mCherry or AAV-dio-hM3Dq-mCherry bilaterally into Ent, GFP<sup>+</sup> cell bodies were evident in the lateral and medial Ent (lEnt, **a**, **c**; mEnt, **b**), and mCherry<sup>+</sup> terminals in the outer molecular layer (Mol) of the DG (**c-f**), with no terminals evident in CA3 (**f**), subiculum (Sub, **g**), or amygdala (Amyg, **h**). Dotted lines in (**d-f**, **g**) delineates DG GCL, in (**g**) outlines subiculum, and in (**h**) outlines amygdala. Scale bar (**a**)=200 $\mu$ m applies (**a-h**). **(i)** After CNO injections for 4 weeks, cfos<sup>+</sup> cell density was increased in lEnt and mEnt of hM3Dq mice vs. mCherry mice (two-way ANOVA, Ent subregion [ $F_{1, 14}=1.397$ ,  $p>0.5$ ]; virus [ $F_{1, 14}=23.32$ ,  $***p<0.001$ ]; Ent subregion X virus [ $F_{1, 14}=0.2553$ ,  $p>0.05$ ]: virus posthoc  $*p<0.05$ ,  $**p<0.01$ ,  $n= 5$  lEnt/mCherry, 4 lEnt/hM3Dq, 5 mEnt/mCherry, 4 mEnt/hM3Dq). **(j)** cFos<sup>+</sup> cell number was also increased along the anterior-posterior axis of the DG (two-way ANOVA, Bregma [ $F_{14, 120}=21.72$ ,  $****p<0.0001$ ]; virus [ $F_{1, 120}=53.28$ ,  $****p<0.0001$ ]; Bregma X virus [ $F_{14, 120}=2.087$ ,  $*p<0.05$ ]: virus posthoc  $**p<0.01$ ,  $***p<0.001$ ,  $****p<0.0001$ ;  $n= 5$  mCherry, 5 hM3Dq). Amygdala, amyg; Ent, entorhinal cortex; GCL, granule cell layer; Mol, molecular layer; SLM, stratum lacunosum moleculare; Sub, subiculum. Mean $\pm$ SEM shown (**i-j**) with data points from individual animals overlaid (**i**). See **Supplementary Table 1** and the **Life Sciences Reporting Summary** for detailed statistical information.

**Supplementary Figure 11. *In vivo* EEG analysis reveals similar activity in AAV mCherry-infused vs. AAV-hM3Dq-infused mice. (a)** Timeline of *in vivo* awake and behaving EEG



experiments. **(b-d)** Representative hippocampal traces from mice that received bilateral Ent AAV-mCherry **(b)** or AAV-hM3Dq **(c-d)** and CNO at a dose of 1 mg/kg **(b-c)** or 10 mg/kg **(d)**. While the high dose of CNO resulted in epileptiform activity **(d)**, no abnormal activity was detected in either mCherry or hM3Dq mice that received the standard lower dose of CNO. Calibration **(d)**=10 sec, 0.5 mV applies **(b-d)**. **(e-g)** Power value for analyzed waves was similar in control (mCherry) and hM3Dq mice both during the day pre-CNO **(e)**, the day post-CNO **(f)** and the night post-CNO **(g)**. **(e)** two-way ANOVA, bands [ $F_{4,30}=219.2$ ,  $p<0.0001$ ]; virus [ $F_{1,30}=1.817$ ,  $p>0.05$ ]; bands X virus [ $F_{4,30}=0.9372$ ,  $p>0.05$ ], **(f)** two-way ANOVA, bands [ $F_{4,30}=276.6$ ,  $p<0.0001$ ]; virus [ $F_{1,30}=0.149$ ,  $p>0.05$ ]; bands X virus [ $F_{4,30}=0.3188$ ,  $p>0.05$ ], **(g)** two-way ANOVA, bands [ $F_{4,30}=163.6$ ,  $p<0.0001$ ]; virus [ $F_{1,30}=0.4729$ ,  $p>0.05$ ]; bands X virus [ $F_{4,30}=0.2888$ ,  $p>0.05$ ];  $n=4$  mCherry, 4 hM3Dq. Mean $\pm$ SEM shown with data points from individual animals overlaid **(e-g)**. See **Supplementary Table 1** and the **Life Sciences Reporting Summary** for detailed statistical information.

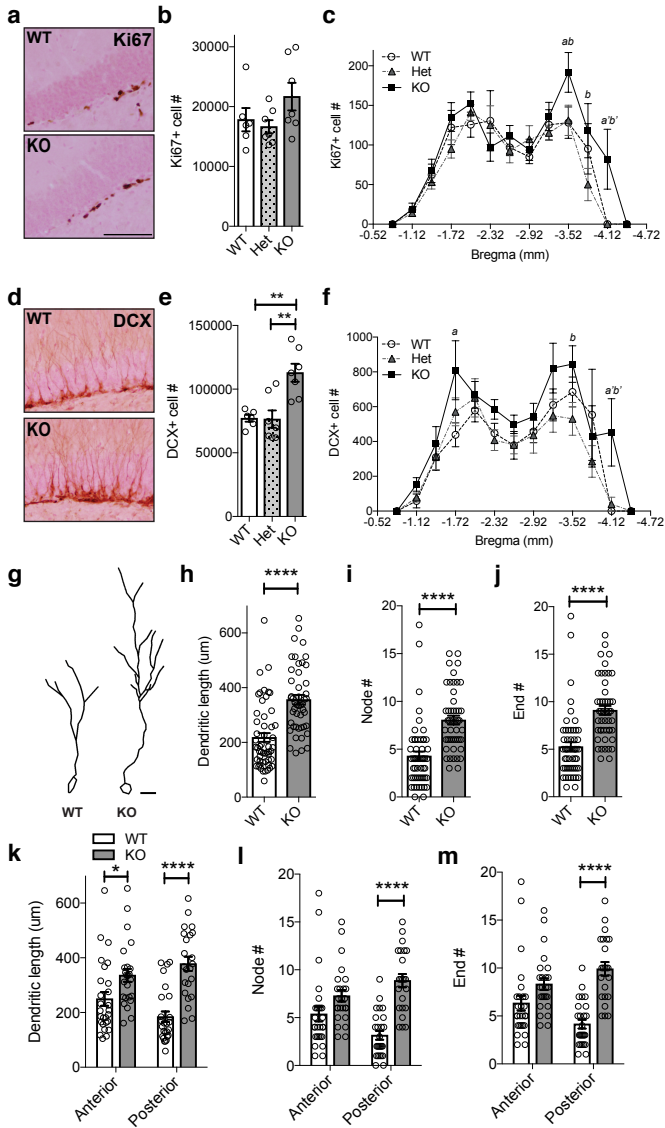

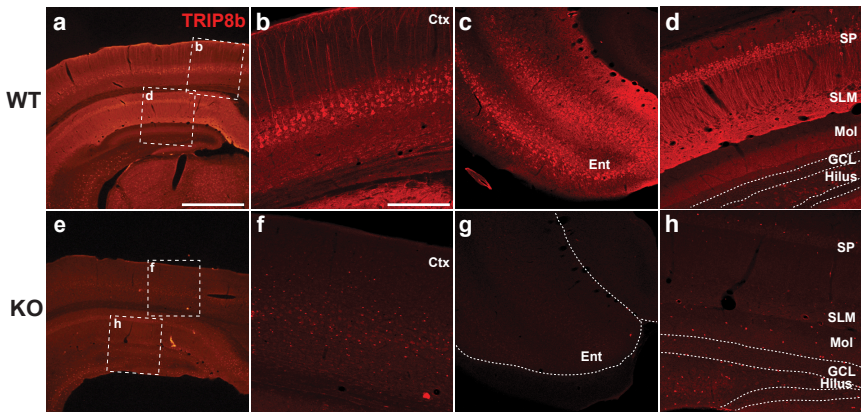

i

| Brain region | Expression level | Brain region | Expression level |
|--------------|------------------|--------------|------------------|
| Ctx          | I                | CA1 SO       | -                |
|              | II/III/IV        | SP           | +++              |
|              | V/VI             | SR           | ++               |
| Ent          | I                | SLM          | ++++             |
|              | II/III           | Mol          | +                |
|              | IV               | GCL          | -                |
|              | V/VI             | Hilus        | +                |

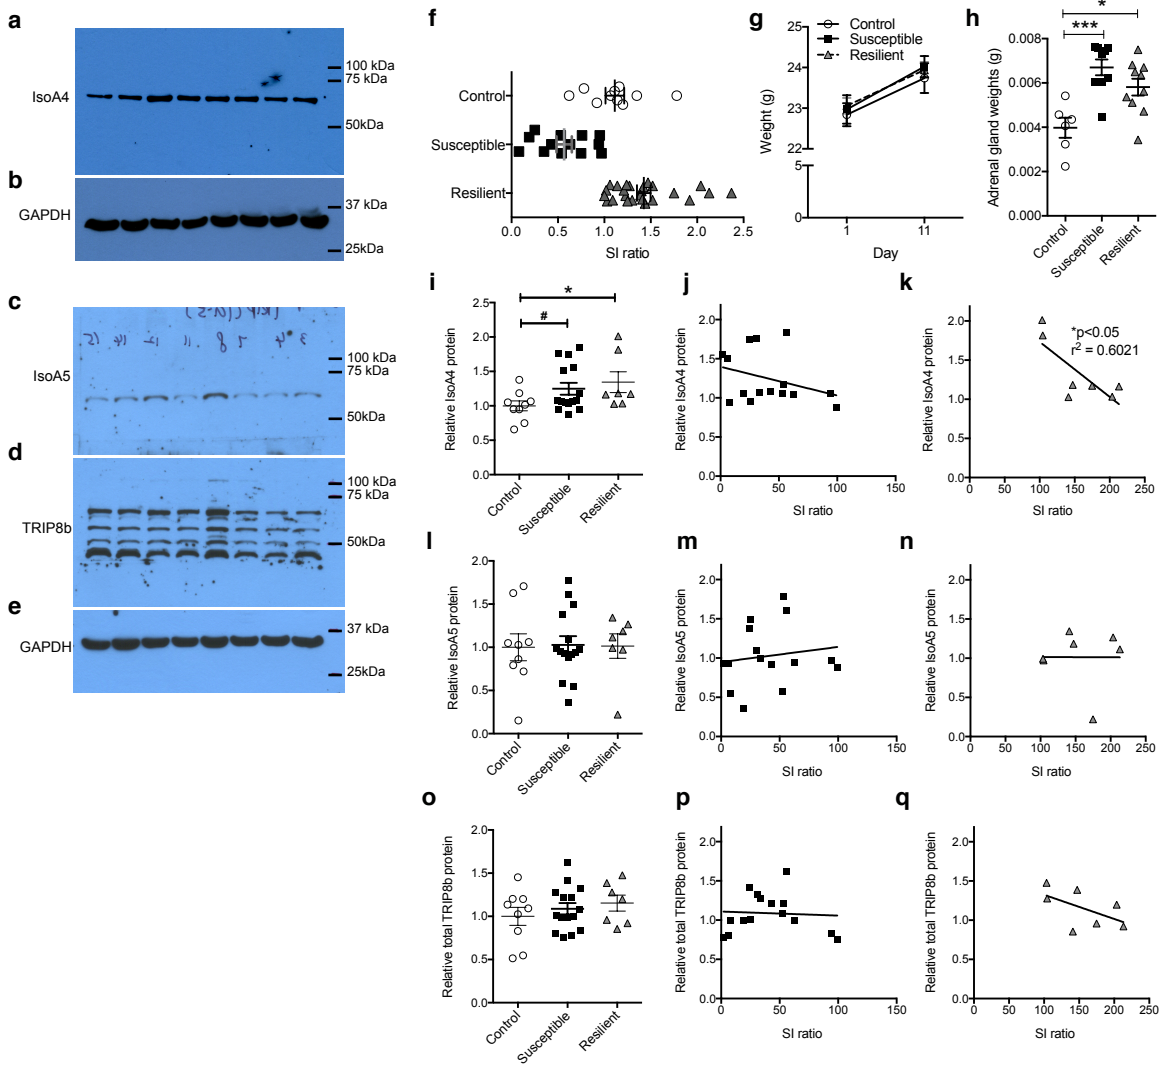

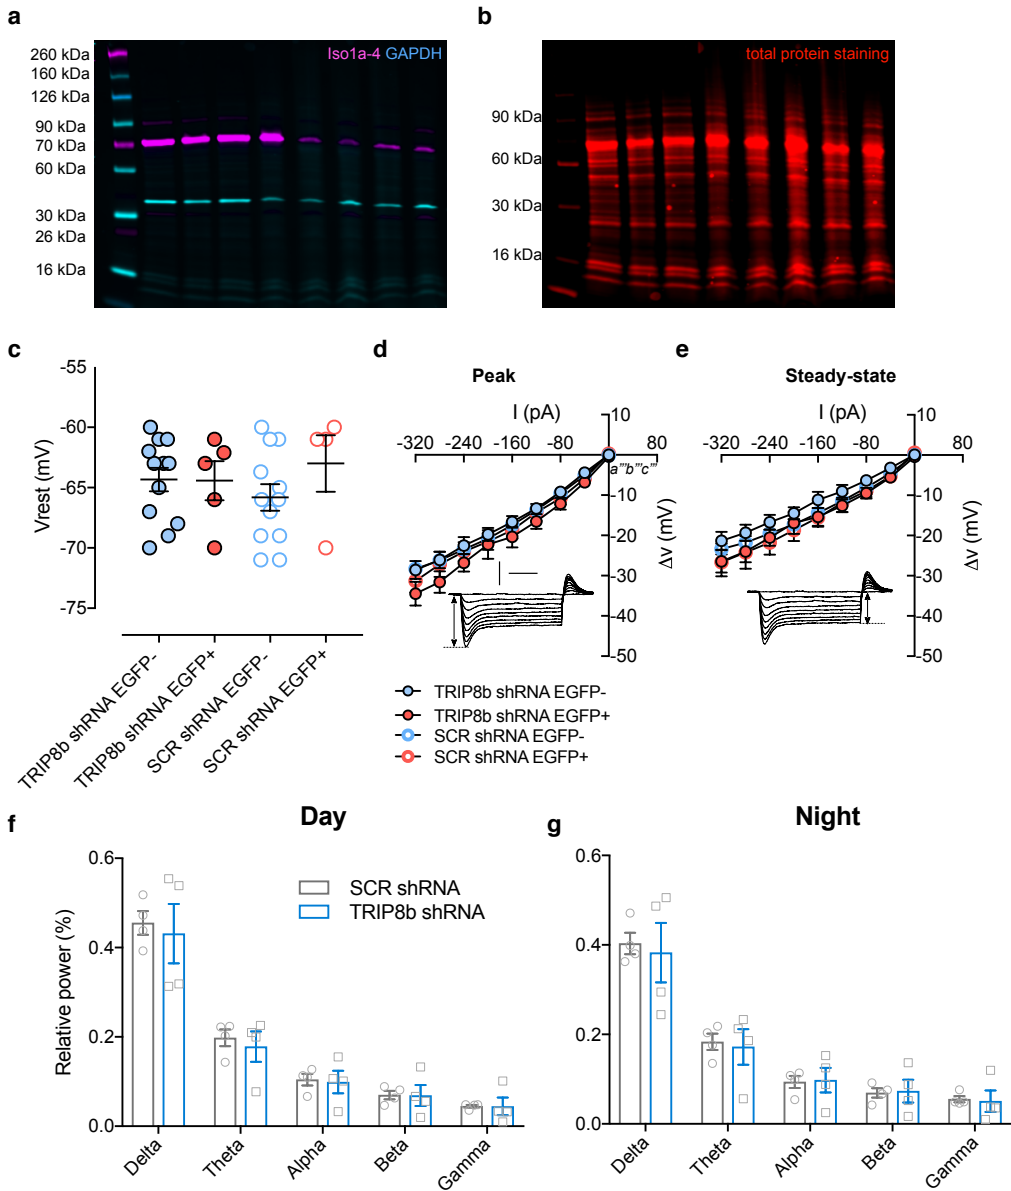

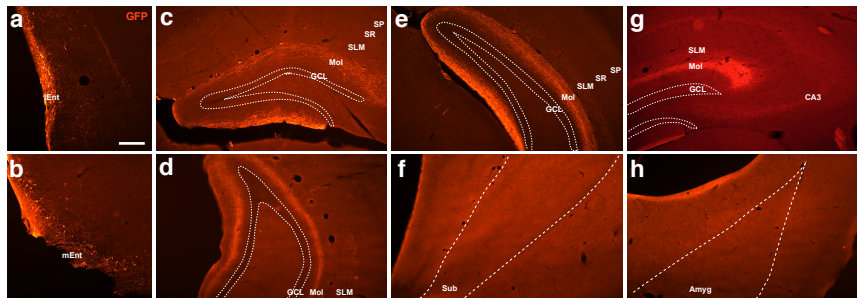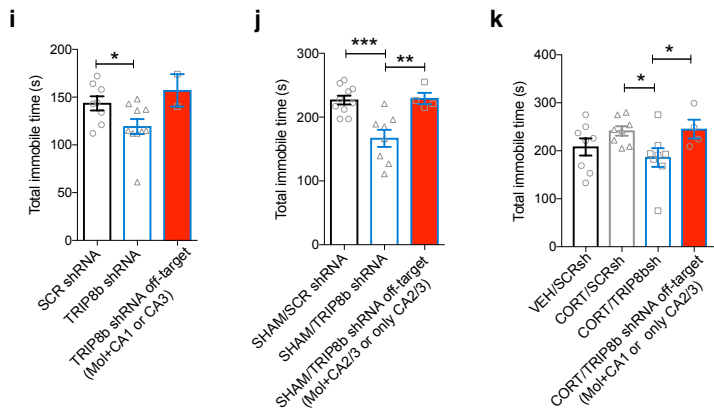

**a**

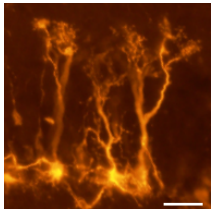

**b**

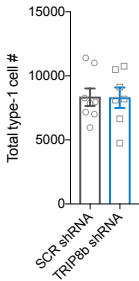

**c**

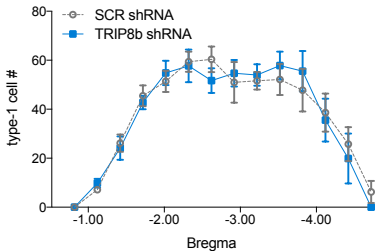

**a**

**LM**

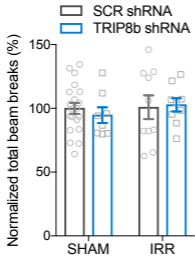

**b**

**FST**

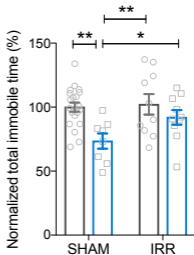



Supplementary Fig 8. Yun et al.

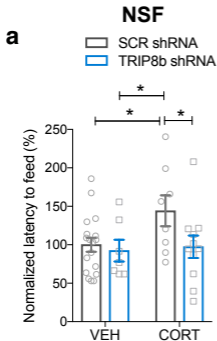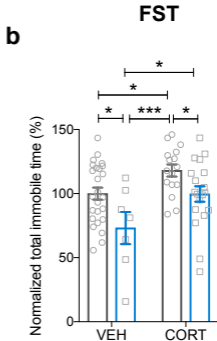

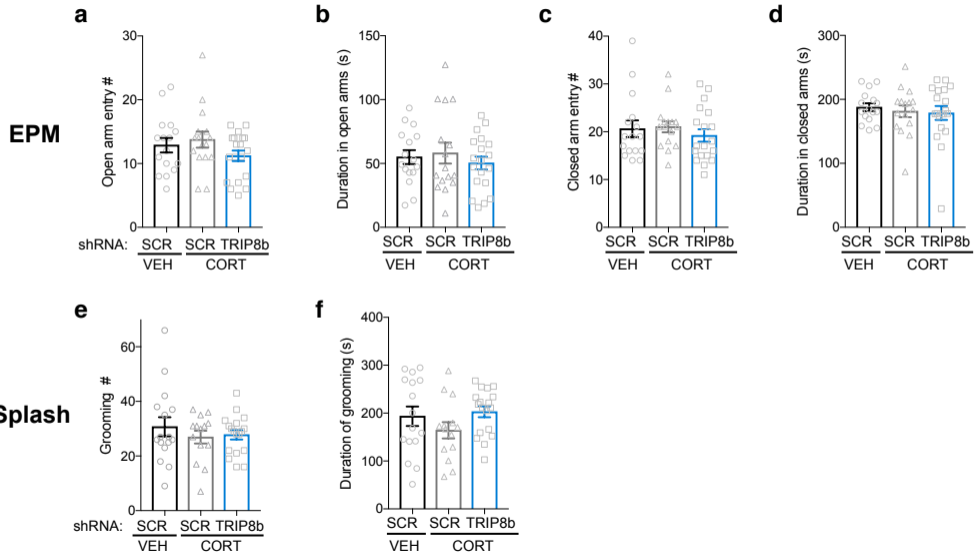

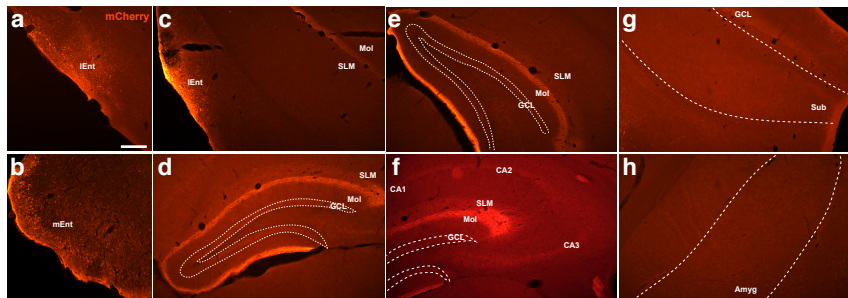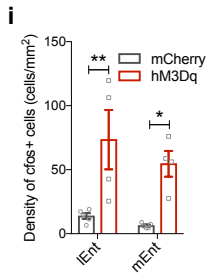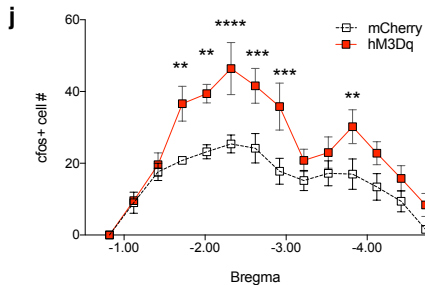

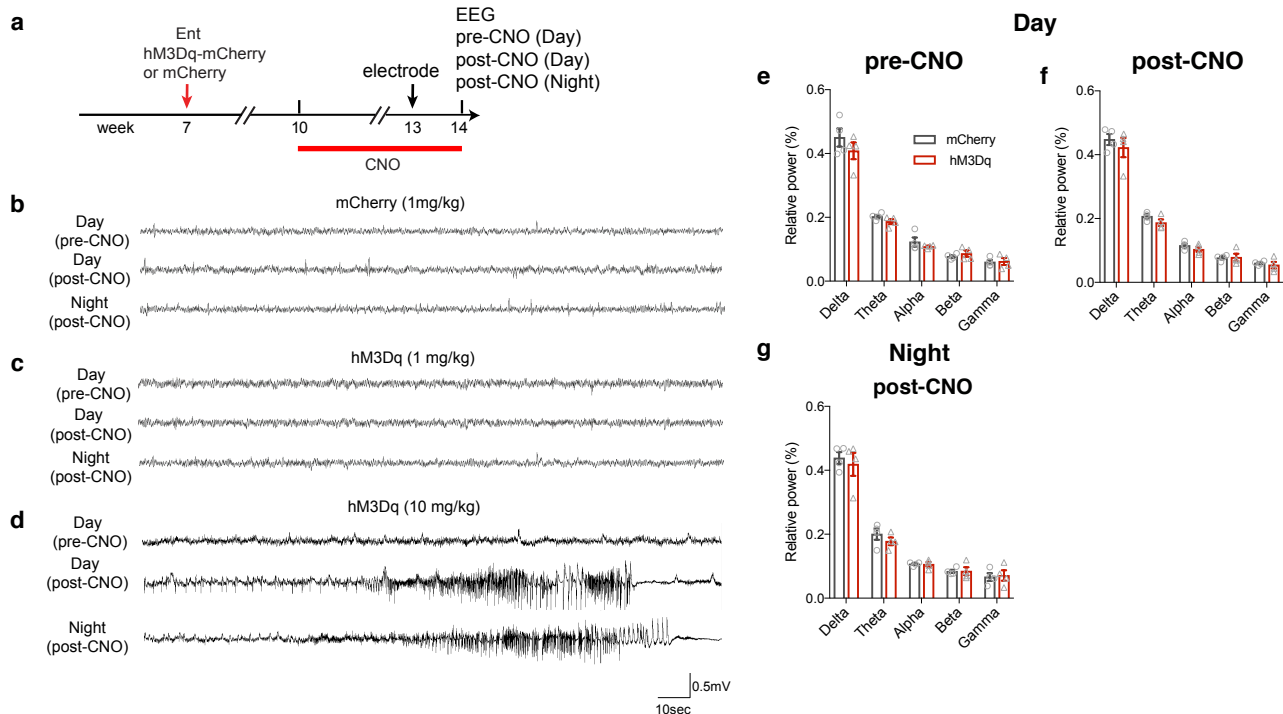

Supplementary Table 1. Reporting statistical results

| Subject                                  | Figure              | Mean ± SEM                                                                                                                                                                                                                                                                                                                                                                                                                                                                                                                                                                                                                                                                                                                                                                                                                                                                                                                                                                                                                                 | n                                                                  | Statistics                                                               | Interaction    | F Value                                                                        | P value              | Post hoc              | Was it replicated?                                                                                      |     |     |             |               |               |               |               |                |                |                |  |             |               |               |                |                |                |                |                |  |             |             |               |               |               |                |                |                |  |             |             |             |               |               |                |                |                |  |                        |             |                     |          |            |  |
|------------------------------------------|---------------------|--------------------------------------------------------------------------------------------------------------------------------------------------------------------------------------------------------------------------------------------------------------------------------------------------------------------------------------------------------------------------------------------------------------------------------------------------------------------------------------------------------------------------------------------------------------------------------------------------------------------------------------------------------------------------------------------------------------------------------------------------------------------------------------------------------------------------------------------------------------------------------------------------------------------------------------------------------------------------------------------------------------------------------------------|--------------------------------------------------------------------|--------------------------------------------------------------------------|----------------|--------------------------------------------------------------------------------|----------------------|-----------------------|---------------------------------------------------------------------------------------------------------|-----|-----|-------------|---------------|---------------|---------------|---------------|----------------|----------------|----------------|--|-------------|---------------|---------------|----------------|----------------|----------------|----------------|----------------|--|-------------|-------------|---------------|---------------|---------------|----------------|----------------|----------------|--|-------------|-------------|-------------|---------------|---------------|----------------|----------------|----------------|--|------------------------|-------------|---------------------|----------|------------|--|
| IsoA4 level                              | 1c                  | 1.000 ± 0.07165<br>1.279 ± 0.07430                                                                                                                                                                                                                                                                                                                                                                                                                                                                                                                                                                                                                                                                                                                                                                                                                                                                                                                                                                                                         | Control: 9<br>Stressed: 22                                         | two-tailed<br>t-test                                                     |                |                                                                                | *p=0.0345            |                       | Yes. 2 independent experiments                                                                          |     |     |             |               |               |               |               |                |                |                |  |             |               |               |                |                |                |                |                |  |             |             |               |               |               |                |                |                |  |             |             |             |               |               |                |                |                |  |                        |             |                     |          |            |  |
| IsoA5 level                              | 1d                  | 1.000 ± 0.1563<br>1.023 ± 0.08116                                                                                                                                                                                                                                                                                                                                                                                                                                                                                                                                                                                                                                                                                                                                                                                                                                                                                                                                                                                                          | Control: 9<br>Stressed: 22                                         | two-tailed<br>t-test                                                     |                |                                                                                | p>0.05<br>(p=0.8872) |                       | Yes. 2 independent experiments                                                                          |     |     |             |               |               |               |               |                |                |                |  |             |               |               |                |                |                |                |                |  |             |             |               |               |               |                |                |                |  |             |             |             |               |               |                |                |                |  |                        |             |                     |          |            |  |
| TRIP8b level                             | 1e                  | 1.000 ± 0.1042<br>1.109 ± 0.05275                                                                                                                                                                                                                                                                                                                                                                                                                                                                                                                                                                                                                                                                                                                                                                                                                                                                                                                                                                                                          | Control: 9<br>Stressed: 22                                         | two-tailed<br>t-test                                                     |                |                                                                                | p>0.05<br>(p=0.3108) |                       | Yes. 2 independent experiments                                                                          |     |     |             |               |               |               |               |                |                |                |  |             |               |               |                |                |                |                |                |  |             |             |               |               |               |                |                |                |  |             |             |             |               |               |                |                |                |  |                        |             |                     |          |            |  |
| TRIP8b level                             | 2c                  | 1 ± 0.1685<br>0.13 ± 0.01148                                                                                                                                                                                                                                                                                                                                                                                                                                                                                                                                                                                                                                                                                                                                                                                                                                                                                                                                                                                                               | SCR shRNA: 4<br>TRIP8b shRNA: 4                                    | two-tailed<br>t-test                                                     |                |                                                                                | **p=0.0021           |                       | Yes. 2 independent experiments                                                                          |     |     |             |               |               |               |               |                |                |                |  |             |               |               |                |                |                |                |                |  |             |             |               |               |               |                |                |                |  |             |             |             |               |               |                |                |                |  |                        |             |                     |          |            |  |
| Number of spikes after Ent KD of TRIP8b  | 2g                  | <table border="1"> <thead> <tr> <th></th> <th>0</th> <th>40</th> <th>80</th> <th>120</th> <th>160</th> <th>240</th> <th>280</th> <th>320</th> </tr> </thead> <tbody> <tr> <td>0.00 ± 0.00</td> <td>0.524 ± 0.382</td> <td>2.036 ± 0.625</td> <td>4.953 ± 0.712</td> <td>8.024 ± 1.215</td> <td>14.379 ± 1.700</td> <td>17.050 ± 1.683</td> <td>20.264 ± 1.731</td> <td></td> </tr> <tr> <td>0.00 ± 0.00</td> <td>1.334 ± 1.174</td> <td>5.600 ± 2.296</td> <td>10.500 ± 3.120</td> <td>15.260 ± 2.449</td> <td>22.400 ± 2.367</td> <td>25.260 ± 2.379</td> <td>27.800 ± 13.93</td> <td></td> </tr> <tr> <td>0.00 ± 0.00</td> <td>0.00 ± 0.00</td> <td>0.789 ± 0.469</td> <td>3.308 ± 1.273</td> <td>6.846 ± 1.568</td> <td>15.000 ± 2.003</td> <td>18.000 ± 2.022</td> <td>21.000 ± 1.994</td> <td></td> </tr> <tr> <td>0.00 ± 0.00</td> <td>0.00 ± 0.00</td> <td>0.00 ± 0.00</td> <td>0.500 ± 0.500</td> <td>2.500 ± 1.500</td> <td>11.000 ± 2.198</td> <td>14.250 ± 2.287</td> <td>17.000 ± 1.958</td> <td></td> </tr> </tbody> </table> |                                                                    | 0                                                                        | 40             | 80                                                                             | 120                  | 160                   | 240                                                                                                     | 280 | 320 | 0.00 ± 0.00 | 0.524 ± 0.382 | 2.036 ± 0.625 | 4.953 ± 0.712 | 8.024 ± 1.215 | 14.379 ± 1.700 | 17.050 ± 1.683 | 20.264 ± 1.731 |  | 0.00 ± 0.00 | 1.334 ± 1.174 | 5.600 ± 2.296 | 10.500 ± 3.120 | 15.260 ± 2.449 | 22.400 ± 2.367 | 25.260 ± 2.379 | 27.800 ± 13.93 |  | 0.00 ± 0.00 | 0.00 ± 0.00 | 0.789 ± 0.469 | 3.308 ± 1.273 | 6.846 ± 1.568 | 15.000 ± 2.003 | 18.000 ± 2.022 | 21.000 ± 1.994 |  | 0.00 ± 0.00 | 0.00 ± 0.00 | 0.00 ± 0.00 | 0.500 ± 0.500 | 2.500 ± 1.500 | 11.000 ± 2.198 | 14.250 ± 2.287 | 17.000 ± 1.958 |  | TRIP8b shRNA EGFP-: 14 | Interaction | F (24, 256) = 2.326 | p=0.0007 | Bonferroni |  |
|                                          |                     |                                                                                                                                                                                                                                                                                                                                                                                                                                                                                                                                                                                                                                                                                                                                                                                                                                                                                                                                                                                                                                            | 0                                                                  | 40                                                                       | 80             | 120                                                                            | 160                  | 240                   | 280                                                                                                     | 320 |     |             |               |               |               |               |                |                |                |  |             |               |               |                |                |                |                |                |  |             |             |               |               |               |                |                |                |  |             |             |             |               |               |                |                |                |  |                        |             |                     |          |            |  |
|                                          |                     | 0.00 ± 0.00                                                                                                                                                                                                                                                                                                                                                                                                                                                                                                                                                                                                                                                                                                                                                                                                                                                                                                                                                                                                                                | 0.524 ± 0.382                                                      | 2.036 ± 0.625                                                            | 4.953 ± 0.712  | 8.024 ± 1.215                                                                  | 14.379 ± 1.700       | 17.050 ± 1.683        | 20.264 ± 1.731                                                                                          |     |     |             |               |               |               |               |                |                |                |  |             |               |               |                |                |                |                |                |  |             |             |               |               |               |                |                |                |  |             |             |             |               |               |                |                |                |  |                        |             |                     |          |            |  |
|                                          |                     | 0.00 ± 0.00                                                                                                                                                                                                                                                                                                                                                                                                                                                                                                                                                                                                                                                                                                                                                                                                                                                                                                                                                                                                                                | 1.334 ± 1.174                                                      | 5.600 ± 2.296                                                            | 10.500 ± 3.120 | 15.260 ± 2.449                                                                 | 22.400 ± 2.367       | 25.260 ± 2.379        | 27.800 ± 13.93                                                                                          |     |     |             |               |               |               |               |                |                |                |  |             |               |               |                |                |                |                |                |  |             |             |               |               |               |                |                |                |  |             |             |             |               |               |                |                |                |  |                        |             |                     |          |            |  |
| 0.00 ± 0.00                              | 0.00 ± 0.00         | 0.789 ± 0.469                                                                                                                                                                                                                                                                                                                                                                                                                                                                                                                                                                                                                                                                                                                                                                                                                                                                                                                                                                                                                              | 3.308 ± 1.273                                                      | 6.846 ± 1.568                                                            | 15.000 ± 2.003 | 18.000 ± 2.022                                                                 | 21.000 ± 1.994       |                       |                                                                                                         |     |     |             |               |               |               |               |                |                |                |  |             |               |               |                |                |                |                |                |  |             |             |               |               |               |                |                |                |  |             |             |             |               |               |                |                |                |  |                        |             |                     |          |            |  |
| 0.00 ± 0.00                              | 0.00 ± 0.00         | 0.00 ± 0.00                                                                                                                                                                                                                                                                                                                                                                                                                                                                                                                                                                                                                                                                                                                                                                                                                                                                                                                                                                                                                                | 0.500 ± 0.500                                                      | 2.500 ± 1.500                                                            | 11.000 ± 2.198 | 14.250 ± 2.287                                                                 | 17.000 ± 1.958       |                       |                                                                                                         |     |     |             |               |               |               |               |                |                |                |  |             |               |               |                |                |                |                |                |  |             |             |               |               |               |                |                |                |  |             |             |             |               |               |                |                |                |  |                        |             |                     |          |            |  |
| TRIP8b shRNA EGFP+: 5                    | Input               | F (8, 256) = 188.0                                                                                                                                                                                                                                                                                                                                                                                                                                                                                                                                                                                                                                                                                                                                                                                                                                                                                                                                                                                                                         | p<0.0001                                                           | TRIP8b shRNA EGFP+ vs. TRIP8b shRNA EGFP-: a p<0.05, a' p<0.01           |                |                                                                                |                      |                       |                                                                                                         |     |     |             |               |               |               |               |                |                |                |  |             |               |               |                |                |                |                |                |  |             |             |               |               |               |                |                |                |  |             |             |             |               |               |                |                |                |  |                        |             |                     |          |            |  |
| SCR shRNA EGFP-: 13                      | RM two-way          | F (3, 32) = 4.143                                                                                                                                                                                                                                                                                                                                                                                                                                                                                                                                                                                                                                                                                                                                                                                                                                                                                                                                                                                                                          | p=0.0137                                                           | TRIP8b shRNA EGFP+ vs. SCR shRNA EGFP-: b p<0.05, b' p<0.01              | No.            |                                                                                |                      |                       |                                                                                                         |     |     |             |               |               |               |               |                |                |                |  |             |               |               |                |                |                |                |                |  |             |             |               |               |               |                |                |                |  |             |             |             |               |               |                |                |                |  |                        |             |                     |          |            |  |
| SCR shRNA EGFP+: 4                       | Subjects (matching) | F (32, 256) = 13.87                                                                                                                                                                                                                                                                                                                                                                                                                                                                                                                                                                                                                                                                                                                                                                                                                                                                                                                                                                                                                        | p<0.0001                                                           | TRIP8b shRNA EGFP+ vs. SCR shRNA EGFP+: c p<0.05, c' p<0.01, c'' p<0.001 |                |                                                                                |                      |                       |                                                                                                         |     |     |             |               |               |               |               |                |                |                |  |             |               |               |                |                |                |                |                |  |             |             |               |               |               |                |                |                |  |             |             |             |               |               |                |                |                |  |                        |             |                     |          |            |  |
| DCX+ cell number                         | 2o                  | 68839 ± 2042<br>76644 ± 2890                                                                                                                                                                                                                                                                                                                                                                                                                                                                                                                                                                                                                                                                                                                                                                                                                                                                                                                                                                                                               | SCR shRNA: 6<br>TRIP8b shRNA: 5                                    | two-tailed<br>t-test                                                     |                |                                                                                | *p=0.0499            |                       | No.                                                                                                     |     |     |             |               |               |               |               |                |                |                |  |             |               |               |                |                |                |                |                |  |             |             |               |               |               |                |                |                |  |             |             |             |               |               |                |                |                |  |                        |             |                     |          |            |  |
| BrdU+ cell number                        | 2q                  | 664.0 ± 74.25<br>1035 ± 145.0                                                                                                                                                                                                                                                                                                                                                                                                                                                                                                                                                                                                                                                                                                                                                                                                                                                                                                                                                                                                              | SCR shRNA: 8<br>TRIP8b shRNA: 7                                    | two-tailed<br>t-test                                                     |                |                                                                                | *p=0.0339            |                       | Yes. 2 independent experiments combined.                                                                |     |     |             |               |               |               |               |                |                |                |  |             |               |               |                |                |                |                |                |  |             |             |               |               |               |                |                |                |  |             |             |             |               |               |                |                |                |  |                        |             |                     |          |            |  |
| NeuN/BrdU cell number                    | 2s                  | 350.0 ± 42.74<br>576.6 ± 88.20                                                                                                                                                                                                                                                                                                                                                                                                                                                                                                                                                                                                                                                                                                                                                                                                                                                                                                                                                                                                             | SCR shRNA: 8<br>TRIP8b shRNA: 7                                    | two-tailed<br>t-test                                                     |                |                                                                                | *p=0.0315            |                       | Yes. 2 independent experiments combined.                                                                |     |     |             |               |               |               |               |                |                |                |  |             |               |               |                |                |                |                |                |  |             |             |               |               |               |                |                |                |  |             |             |             |               |               |                |                |                |  |                        |             |                     |          |            |  |
| Dendritic length                         | 2u                  | 189.6 ± 8.300<br>233.8 ± 10.48                                                                                                                                                                                                                                                                                                                                                                                                                                                                                                                                                                                                                                                                                                                                                                                                                                                                                                                                                                                                             | SCR shRNA: 76<br>TRIP8b shRNA: 95                                  | two-tailed<br>t-test                                                     |                |                                                                                | **p=0.0017           |                       | No.                                                                                                     |     |     |             |               |               |               |               |                |                |                |  |             |               |               |                |                |                |                |                |  |             |             |               |               |               |                |                |                |  |             |             |             |               |               |                |                |                |  |                        |             |                     |          |            |  |
| Dendritic nodes                          | 2v                  | 4.434 ± 0.2394<br>5.547 ± 0.287                                                                                                                                                                                                                                                                                                                                                                                                                                                                                                                                                                                                                                                                                                                                                                                                                                                                                                                                                                                                            | SCR shRNA: 76<br>TRIP8b shRNA: 95                                  | two-tailed<br>t-test                                                     |                |                                                                                | **p=0.0044           |                       | No.                                                                                                     |     |     |             |               |               |               |               |                |                |                |  |             |               |               |                |                |                |                |                |  |             |             |               |               |               |                |                |                |  |             |             |             |               |               |                |                |                |  |                        |             |                     |          |            |  |
| Dendritic ends                           | 2w                  | 5.500 ± 0.2410<br>6.621 ± 0.2918                                                                                                                                                                                                                                                                                                                                                                                                                                                                                                                                                                                                                                                                                                                                                                                                                                                                                                                                                                                                           | SCR shRNA: 76<br>TRIP8b shRNA: 95                                  | two-tailed<br>t-test                                                     |                |                                                                                | **p=0.0047           |                       | No.                                                                                                     |     |     |             |               |               |               |               |                |                |                |  |             |               |               |                |                |                |                |                |  |             |             |               |               |               |                |                |                |  |             |             |             |               |               |                |                |                |  |                        |             |                     |          |            |  |
| Activity (LM)                            | 3b                  | 8905 ± 304.0<br>9734 ± 735.3                                                                                                                                                                                                                                                                                                                                                                                                                                                                                                                                                                                                                                                                                                                                                                                                                                                                                                                                                                                                               | SCR shRNA: 16<br>TRIP8b shRNA: 17                                  | two-tailed<br>t-test                                                     |                |                                                                                | p>0.05<br>(p=0.3166) |                       | Yes. 2 independent experiments combined.                                                                |     |     |             |               |               |               |               |                |                |                |  |             |               |               |                |                |                |                |                |  |             |             |               |               |               |                |                |                |  |             |             |             |               |               |                |                |                |  |                        |             |                     |          |            |  |
| Forced Swim Test (FST)                   | 3c                  | 143.5 ± 7.358<br>119.3 ± 7.851                                                                                                                                                                                                                                                                                                                                                                                                                                                                                                                                                                                                                                                                                                                                                                                                                                                                                                                                                                                                             | SCR shRNA: 8<br>SCR shRNA: 10                                      | two-tailed<br>t-test                                                     |                |                                                                                | *p=0.0426            |                       | No.                                                                                                     |     |     |             |               |               |               |               |                |                |                |  |             |               |               |                |                |                |                |                |  |             |             |               |               |               |                |                |                |  |             |             |             |               |               |                |                |                |  |                        |             |                     |          |            |  |
| Context, % freezing                      | 3d                  | 33.05 ± 1.664<br>50.61 ± 4.552                                                                                                                                                                                                                                                                                                                                                                                                                                                                                                                                                                                                                                                                                                                                                                                                                                                                                                                                                                                                             | SCR shRNA: 8<br>TRIP8b shRNA: 7                                    | two-tailed<br>t-test                                                     |                |                                                                                | **p=0.0021           |                       | No.                                                                                                     |     |     |             |               |               |               |               |                |                |                |  |             |               |               |                |                |                |                |                |  |             |             |               |               |               |                |                |                |  |             |             |             |               |               |                |                |                |  |                        |             |                     |          |            |  |
| Cue, % freezing                          | 3e                  | Pre-tone                                                                                                                                                                                                                                                                                                                                                                                                                                                                                                                                                                                                                                                                                                                                                                                                                                                                                                                                                                                                                                   | During-tone                                                        | SCR shRNA: 8                                                             | RM two-way     | Interaction<br>Tone (Pre-tone vs. During-tone)<br>shRNA<br>Subjects (matching) | F (1, 13) = 0.004857 | p>0.05<br>(p=0.09455) | Bonferroni<br>Pre tone vs. During tone SCR shRNA p<0.01<br>Pre tone vs. During tone TRIP8b shRNA p<0.01 |     |     |             |               |               |               |               |                |                |                |  |             |               |               |                |                |                |                |                |  |             |             |               |               |               |                |                |                |  |             |             |             |               |               |                |                |                |  |                        |             |                     |          |            |  |
|                                          |                     | 15.714 ± 4.353                                                                                                                                                                                                                                                                                                                                                                                                                                                                                                                                                                                                                                                                                                                                                                                                                                                                                                                                                                                                                             | 61.784 ± 6.249                                                     |                                                                          |                |                                                                                | F (1, 13) = 55.16    | p<0.0001              |                                                                                                         |     |     |             |               |               |               |               |                |                |                |  |             |               |               |                |                |                |                |                |  |             |             |               |               |               |                |                |                |  |             |             |             |               |               |                |                |                |  |                        |             |                     |          |            |  |
|                                          |                     | 19.999 ± 7.217                                                                                                                                                                                                                                                                                                                                                                                                                                                                                                                                                                                                                                                                                                                                                                                                                                                                                                                                                                                                                             | 66.941 ± 2.707                                                     |                                                                          |                |                                                                                | F (1, 13) = 1.117    | p>0.05<br>(p=0.3098)  |                                                                                                         |     |     |             |               |               |               |               |                |                |                |  |             |               |               |                |                |                |                |                |  |             |             |               |               |               |                |                |                |  |             |             |             |               |               |                |                |                |  |                        |             |                     |          |            |  |
| Activity (LM) in IRR experiment          | 3i                  | 6718 ± 456.9<br>6361 ± 409.6<br>6903 ± 349.0                                                                                                                                                                                                                                                                                                                                                                                                                                                                                                                                                                                                                                                                                                                                                                                                                                                                                                                                                                                               | SHAM/SCR shRNA: 10<br>SHAM/TRIP8b shRNA: 8<br>IRR/TRIP8b shRNA: 9  | One-way                                                                  |                | F (2, 24) = 0.4149                                                             | p>0.05<br>(p=0.6651) |                       | Yes. 3 independent experiments combined.                                                                |     |     |             |               |               |               |               |                |                |                |  |             |               |               |                |                |                |                |                |  |             |             |               |               |               |                |                |                |  |             |             |             |               |               |                |                |                |  |                        |             |                     |          |            |  |
| Forced Swim Test (FST) in IRR experiment | 3j                  | 226.8 ± 6.868<br>166.8 ± 13.42<br>208.7 ± 12.84                                                                                                                                                                                                                                                                                                                                                                                                                                                                                                                                                                                                                                                                                                                                                                                                                                                                                                                                                                                            | SHAM/SCR shRNA: 10<br>SHAM/TRIP8b shRNA: 8<br>IRR/TRIP8b shRNA: 10 | One-way                                                                  |                | F (2, 25) = 7.070                                                              | p=0.0037             | *p<0.05<br>**p<0.01   | Yes. 3 independent experiments combined.                                                                |     |     |             |               |               |               |               |                |                |                |  |             |               |               |                |                |                |                |                |  |             |             |               |               |               |                |                |                |  |             |             |             |               |               |                |                |                |  |                        |             |                     |          |            |  |
| Activity (LM) in CORT experiment         | 4b                  | 10586 ± 698.1<br>10513 ± 659<br>10435 ± 762.4                                                                                                                                                                                                                                                                                                                                                                                                                                                                                                                                                                                                                                                                                                                                                                                                                                                                                                                                                                                              | SCR shRNA/VEH: 16<br>SCR shRNA/CORT: 16<br>TRIP8b shRNA/CORT: 19   | One-way                                                                  |                | F (2,48) = 0.01135                                                             | p>0.05<br>(p=0.9887) |                       | Yes. 3 independent experiments combined.                                                                |     |     |             |               |               |               |               |                |                |                |  |             |               |               |                |                |                |                |                |  |             |             |               |               |               |                |                |                |  |             |             |             |               |               |                |                |                |  |                        |             |                     |          |            |  |
| Time spent in light in D/L test          | 4c                  | 169.3 ± 11.31<br>162.8 ± 13.7<br>154.7 ± 13.13                                                                                                                                                                                                                                                                                                                                                                                                                                                                                                                                                                                                                                                                                                                                                                                                                                                                                                                                                                                             | SCR shRNA/VEH: 16<br>SCR shRNA/CORT: 16<br>TRIP8b shRNA /CORT: 19  | One-way                                                                  |                | F (2,48) = 0.3328                                                              | p>0.05<br>(p=0.7185) |                       | Yes. 3 independent experiments combined.                                                                |     |     |             |               |               |               |               |                |                |                |  |             |               |               |                |                |                |                |                |  |             |             |               |               |               |                |                |                |  |             |             |             |               |               |                |                |                |  |                        |             |                     |          |            |  |
| Latency to light in /DL test             | 4d                  | 5.86 ± 0.8118<br>5.362 ± 0.7654                                                                                                                                                                                                                                                                                                                                                                                                                                                                                                                                                                                                                                                                                                                                                                                                                                                                                                                                                                                                            | SCR shRNA/VEH: 16<br>SCR shRNA/CORT: 16                            | One-way                                                                  |                | F (2,48) = 0.249                                                               | p>0.05<br>(p=0.7806) |                       | Yes. 3 independent experiments combined.                                                                |     |     |             |               |               |               |               |                |                |                |  |             |               |               |                |                |                |                |                |  |             |             |               |               |               |                |                |                |  |             |             |             |               |               |                |                |                |  |                        |             |                     |          |            |  |

|                                               |         |  |                                                                                                                                                                                                             |                                   |                                                                            |                                    |                                                                                                                                                                                  |                                                                      |                                                                                                 |                                  |                                          |                                          |
|-----------------------------------------------|---------|--|-------------------------------------------------------------------------------------------------------------------------------------------------------------------------------------------------------------|-----------------------------------|----------------------------------------------------------------------------|------------------------------------|----------------------------------------------------------------------------------------------------------------------------------------------------------------------------------|----------------------------------------------------------------------|-------------------------------------------------------------------------------------------------|----------------------------------|------------------------------------------|------------------------------------------|
| test                                          |         |  | 5.09 ± 0.7731                                                                                                                                                                                               |                                   | TRIP8b<br>shRNA/CORT: 19                                                   |                                    |                                                                                                                                                                                  |                                                                      |                                                                                                 |                                  |                                          | combined.                                |
| Latency to Feed in NSF test                   | 4e      |  | 274.9 ± 17.49<br>396.1 ± 55.14<br>267.5 ± 40.07                                                                                                                                                             |                                   | SCR<br>shRNA/SHAM: 8<br>SCR<br>shRNA/CORT: 8<br>TRIP8b shRNA<br>/CORT:11   | One-way                            |                                                                                                                                                                                  | F (2,24) = 2.934                                                     | p=0.0725                                                                                        | Fisher's LSD                     | *p<0.05                                  | Yes. 3 independent experiments combined. |
| Food mass in post NSF test                    | 4f      |  | 0.1456 ± 0.007076<br>0.08801 ± 0.01587<br>0.1006 ± 0.01427                                                                                                                                                  |                                   | SCR<br>shRNA/SHAM: 8<br>SCR<br>shRNA/CORT: 8<br>TRIP8bshRNA/CO<br>RT: 11   | One-way                            |                                                                                                                                                                                  | F (2,24) = 4.569                                                     | p=0.0208                                                                                        | Fisher's LSD                     | *p<0.05<br>**p<0.01                      | Yes. 3 independent experiments combined. |
| FST_CORT experiment                           | 4g      |  | 191.8 ± 12.13<br>226.3 ± 8.986<br>185.8 ± 10.87                                                                                                                                                             |                                   | SCR<br>shRNA/SHAM: 16<br>SCR<br>shRNA/CORT: 16<br>TRIP8b<br>shRNA/CORT: 19 | One-way                            |                                                                                                                                                                                  | F (2,48) = 3.196                                                     | p=0.0498                                                                                        | Fisher's LSD                     | *p<0.05                                  | Yes. 3 independent experiments combined. |
| Total cfos+cells number                       | 5e      |  | DG                                                                                                                                                                                                          | CA1                               | CA2/CA3                                                                    |                                    |                                                                                                                                                                                  | Interaction<br>F (2, 24) = 4.221                                     | p<0.05<br>(P=0.0269)                                                                            | Bonferroni                       |                                          | No.                                      |
|                                               |         |  | 224.8 ± 20.071                                                                                                                                                                                              | 242.2 ± 31.811                    | 191.2 ± 25.60                                                              | mCherry: 5                         | Two-way                                                                                                                                                                          | Subregion<br>F (2, 24) = 6.065                                       | p<0.01<br>(P=0.00740)                                                                           |                                  | *p<0.05                                  |                                          |
|                                               |         |  | 351 ± 32.278                                                                                                                                                                                                | 218.4 ± 37.312                    | 194.2 ± 6.674                                                              | hM3Dq: 5                           |                                                                                                                                                                                  | Treatment<br>(mCherry vs. hM3Dq)<br>F (1, 24) = 2.442                | p>0.05<br>(P=0.1312)                                                                            |                                  |                                          |                                          |
| Total BrdU+ cell number                       | 5g      |  | 1188 ± 50.63<br>1970 ± 176.1                                                                                                                                                                                |                                   | mCherry: 14<br>hM3Dq: 14                                                   | two-tailed t-test                  |                                                                                                                                                                                  |                                                                      | ***p=0.0002                                                                                     |                                  |                                          | Yes. 2 independent experiments combined. |
| Bregma BrdU+ cell number post-DREADDs         | 5h      |  | -0.82 -1.12 -1.42 -1.72 -2.02 -2.32 -2.62 -2.92 -3.22 -3.52 -3.82 -4.12 -4.42 -4.72                                                                                                                         |                                   |                                                                            |                                    |                                                                                                                                                                                  | Interaction<br>F (13, 364) = 2.901                                   | p=0.0005                                                                                        | Bonferroni                       |                                          | Yes. 2 independent experiments combined. |
|                                               |         |  | 0.000 ± 0.000 0.714 ± 0.266 3.000 ± 0.611 6.071 ± 0.781 10.000 ± 1.351 9.357 ± 0.723 7.071 ± 1.107 5.786 ± 0.447 4.929 ± 0.774 5.286 ± 0.867 5.643 ± 0.868 6.857 ± 1.073 1.357 ± 0.452 0.357 ± 0.000        |                                   |                                                                            | mCherry: 14                        | Two-way                                                                                                                                                                          | Bregma<br>F (13, 364) = 27.90                                        | p<0.0001                                                                                        | mCherry vs. hM3Dq:<br>a p<0.05   |                                          |                                          |
|                                               |         |  | 0.000 ± 0.000 0.571 ± 0.173 4.071 ± 0.880 12.714 ± 1.169 14.429 ± 1.540 12.786 ± 1.704 10.714 ± 1.698 10.143 ± 1.508 10.357 ± 1.532 12.286 ± 1.954 12.000 ± 2.102 8.143 ± 2.019 1.214 ± 0.728 0.000 ± 0.000 |                                   |                                                                            | hM3Dq: 14                          |                                                                                                                                                                                  | Treatment<br>(mCherry vs. hM3Dq)<br>F (1, 364) = 51.07               | p<0.0001                                                                                        | a' p<0.01<br>a'' p<0.001         |                                          |                                          |
| NeuN/BrdU cell number post-DREADDs            | 5j      |  | 706.0 ± 59.11<br>1618 ± 236.2                                                                                                                                                                               |                                   | mCherry: 5<br>hM3Dq: 5                                                     | two-tailed t-test                  |                                                                                                                                                                                  |                                                                      | **p=0.0057                                                                                      |                                  |                                          | No.                                      |
| Activity (LM) post-DREADDs                    | 5l      |  |                                                                                                                                                                                                             |                                   | mCherry: 8<br>hM3Dq: 7                                                     | RM Two-way                         | Interaction<br>Time<br>F (79, 1580) = 0.2065<br>F (79, 1580) = 10.75<br>Treatment<br>(mCherry vs. hM3Dq)<br>F (1, 20) = 0.7316<br>Subjects<br>(matching)<br>F (20, 1580) = 3.971 | p>0.9999<br>p<0.0001<br>p>0.05<br>(p=0.4025)<br>p<0.0001             |                                                                                                 |                                  | Yes. 2 independent experiments combined. |                                          |
| Novelty Suppressed Feeding in NSF test        | 5m      |  | 464.1 ± 70.34<br>249.6 ± 39.27                                                                                                                                                                              |                                   | mCherry: 8<br>hM3Dq: 7                                                     | two-tailed t-test                  |                                                                                                                                                                                  |                                                                      | *p=0.0239                                                                                       |                                  |                                          | Yes. 2 independent experiments combined. |
| Food intake in post NSF test                  | 5n      |  | 0.1270 ± 0.01117<br>0.1557 ± 0.01711                                                                                                                                                                        |                                   | mCherry: 8<br>hM3Dq: 7                                                     | two-tailed t-test                  |                                                                                                                                                                                  |                                                                      | p>0.05<br>(p=0.1727)                                                                            |                                  |                                          | Yes. 2 independent experiments combined. |
| Activity (LM)                                 | 5p      |  |                                                                                                                                                                                                             |                                   | mCherry: 7<br>hM3Dq: 9                                                     | RM Two-way                         | Interaction<br>Time<br>F (79, 1106) = 0.7006<br>F (79, 1106) = 14.82<br>Treatment<br>(mCherry vs. hM3Dq)<br>F (1, 14) = 0.7466<br>Subjects<br>(matching)<br>F (14, 1106) = 9.23  | p>0.05<br>(P=0.9775)<br>p<0.0001<br>p>0.05<br>(P=0.4021)<br>p<0.0001 |                                                                                                 |                                  | Yes. 2 independent experiments combined. |                                          |
| Novelty Suppressed Feeding in NSF test        | 5q      |  | 273.4 ± 50.6<br>356.8 ± 53.36                                                                                                                                                                               |                                   | mCherry: 7<br>hM3Dq: 9                                                     | two-tailed t-test                  |                                                                                                                                                                                  |                                                                      | p>0.05<br>(p=0.2870)                                                                            |                                  |                                          | Yes. 2 independent experiments combined. |
| Food intake in post-NSF                       | 5r      |  | 0.1277 ± 0.01111<br>0.1429 ± 0.0206                                                                                                                                                                         |                                   | mCherry: 7<br>hM3Dq: 9                                                     | two-tailed t-test                  |                                                                                                                                                                                  |                                                                      | p>0.05<br>(p=0.5606)                                                                            |                                  |                                          | Yes. 2 independent experiments combined. |
| Time spent in interaction zone (s) in SI test | 5t      |  | mCherry/SHAM                                                                                                                                                                                                | hM3Dq/SHAM                        | mCherry/CSDS                                                               | hM3Dq/CSDS                         | mCherry/SHAM: 6<br>hM3Dq/SHAM: 6                                                                                                                                                 | RM Two-way                                                           | Interaction<br>Target<br>F (3, 36) = 2.132                                                      | p=0.1132                         | Fisher's LSD                             | Yes. 4 independent experiments combined. |
|                                               |         |  | 98.613333333333 ± 10.0121881280323                                                                                                                                                                          | 73.546666666667 ± 7.2714944207575 | 84.7325 ± 4.71778015419682                                                 | 88.95 ± 4.14630357467146           | mCherry/CSDS: 16<br>hM3Dq/CSDS: 12                                                                                                                                               |                                                                      | Virus<br>Subjects<br>(matching)<br>F (3, 36) = 7.494<br>F (3, 36) = 3.155<br>F (36, 36) = 2.242 | p=0.0096<br>p=0.0365<br>p=0.0088 | *p<0.05<br>**p<0.01                      |                                          |
|                                               |         |  | 118.413333333333 ± 6.06184716899063                                                                                                                                                                         | 93.12 ± 6.1838240599929           | 80.8225 ± 8.89036074081569                                                 | 102.353333333333 ± 6.1222492070754 |                                                                                                                                                                                  |                                                                      |                                                                                                 |                                  |                                          |                                          |
| Ki67+ cell number                             | Supp 1b |  | 17826 ± 1936<br>16650 ± 1106<br>21685 ± 2314                                                                                                                                                                |                                   | WT: 6<br>Het: 7<br>KO: 7                                                   | One-way                            |                                                                                                                                                                                  | F (2, 17) = 2.106                                                    | p>0.05<br>(p=0.1524)                                                                            |                                  |                                          | Yes. 2 independent experiments combined. |
|                                               |         |  | -0.82 -1.12 -1.42 -1.72 -2.02 -2.32 -2.62 -2.92 -3.22 -3.52 -3.82 -4.12 -4.42                                                                                                                               |                                   |                                                                            |                                    |                                                                                                                                                                                  | Interaction<br>F (24, 221) = 1.254                                   | p>0.05<br>(p=0.1989)                                                                            | Bonferroni                       |                                          |                                          |

|                                         |                  |                                                                              |                   |                  |                  |                   |                  |                   |                   |                   |                   |                   |                                                                                |                                                 |                          |                                    |                                                          |                                          |                                                                                                                   |                                                                                 |                                          |                                 |
|-----------------------------------------|------------------|------------------------------------------------------------------------------|-------------------|------------------|------------------|-------------------|------------------|-------------------|-------------------|-------------------|-------------------|-------------------|--------------------------------------------------------------------------------|-------------------------------------------------|--------------------------|------------------------------------|----------------------------------------------------------|------------------------------------------|-------------------------------------------------------------------------------------------------------------------|---------------------------------------------------------------------------------|------------------------------------------|---------------------------------|
| Ki67+ cell number, Bregma               | Supp 1c          | 0.000 ± 0.000                                                                | 18.333 ± 8.511    | 62.667 ± 13.220  | 122.000 ± 21.736 | 125.667 ± 15.958  | 130.667 ± 10.383 | 97.000 ± 8.524    | 85.000 ± 125.500  | 128.333 ± 19.204  | 95.167 ± 19.792   | 0.000 ± 0.000     | 0.000 ± 0.000                                                                  | WT: 6                                           | Two-way                  | Bregma                             | F (12, 221) = 28.39                                      | p<0.0001                                 | WT vs. KO: a p<0.05, a' p<0.01                                                                                    | Yes. 2 independent experiments combined.                                        |                                          |                                 |
|                                         |                  | 0.000 ± 0.000                                                                | 14.143 ± 4.458    | 53.143 ± 8.727   | 95.000 ± 11.431  | 141.000 ± 9.810   | 125.143 ± 24.407 | 92.571 ± 15.225   | 107.286 ± 17.203  | 115.429 ± 9.661   | 131.143 ± 19.103  | 50.143 ± 20.487   | 0.000 ± 0.000                                                                  | 0.000 ± 0.000                                   |                          |                                    | Het: 7                                                   | Genotype                                 | F (2, 221) = 5.753                                                                                                |                                                                                 | p=0.0037                                 | KO vs. Het: b p<0.05, b' p<0.01 |
|                                         |                  | 0.000 ± 0.000                                                                | 19.000 ± 2.488    | 67.286 ± 14.846  | 135.429 ± 18.170 | 152.429 ± 14.633  | 97.286 ± 17.864  | 111.571 ± 13.122  | 93.857 ± 13.500   | 136.000 ± 17.928  | 191.714 ± 25.174  | 118.000 ± 34.317  | 82.143 ± 37.821                                                                | 0.000 ± 0.000                                   |                          |                                    | KO: 7                                                    |                                          |                                                                                                                   |                                                                                 |                                          |                                 |
| DCX+ cell number                        | Supp 1e          | 77106 ± 2656<br>76454 ± 6769<br>112889 ± 7095                                |                   |                  |                  |                   |                  |                   |                   |                   |                   |                   | WT: 6<br>Het: 7<br>KO: 7                                                       | One-way                                         | F (2, 17) = 11.84        | p=0.0006                           | Bonferroni<br>** p<0.01                                  | Yes. 2 independent experiments combined. |                                                                                                                   |                                                                                 |                                          |                                 |
| DCX+ cell number Bregma                 | Supp 1f          | -0.82                                                                        | -1.12             | -1.42            | -1.72            | -2.02             | -2.32            | -2.62             | -2.92             | -3.22             | -3.52             | -3.82             | -4.12                                                                          | -4.42                                           | WT: 6<br>Het: 7<br>KO: 7 | Two-way                            | Interaction                                              | F (24, 221) = 0.9315                     | p>0.05 (p=0.5591)                                                                                                 | Bonferroni<br>WT vs. KO: a p<0.05, a' p<0.01<br>KO vs. Het: b p<0.05, b' p<0.01 | Yes. 2 independent experiments combined. |                                 |
|                                         |                  | 0.000 ± 0.000                                                                | 58.500 ± 39.655   | 309.167 ± 75.315 | 438.167 ± 89.239 | 579.167 ± 66.473  | 447.500 ± 64.714 | 378.167 ± 79.337  | 457.500 ± 64.714  | 610.167 ± 91.661  | 884.667 ± 85.660  | 553.333 ± 261.645 | 0.000 ± 0.000                                                                  | 0.000 ± 0.000                                   |                          |                                    |                                                          |                                          |                                                                                                                   |                                                                                 |                                          |                                 |
|                                         |                  | 0.000 ± 0.000                                                                | 78.286 ± 25.650   | 314.571 ± 75.903 | 570.286 ± 80.769 | 650.714 ± 110.310 | 407.857 ± 59.233 | 380.714 ± 51.385  | 435.857 ± 102.645 | 548.429 ± 95.035  | 530.429 ± 94.826  | 285.286 ± 91.022  | 39.857 ± 0.000                                                                 | 0.000 ± 0.000                                   |                          |                                    |                                                          |                                          |                                                                                                                   |                                                                                 |                                          |                                 |
| 0.000 ± 0.000                           | 153.286 ± 38.833 | 388.000 ± 89.396                                                             | 809.429 ± 169.302 | 667.857 ± 78.802 | 584.714 ± 66.350 | 499.00 ± 52.933   | 543.286 ± 78.533 | 821.571 ± 143.471 | 845.429 ± 105.317 | 429.571 ± 176.325 | 452.286 ± 193.951 | 0.000 ± 0.000     | 0.000 ± 0.000                                                                  |                                                 |                          |                                    |                                                          |                                          |                                                                                                                   |                                                                                 |                                          |                                 |
| Dendritic length                        | Supp 1h          | 218.0 ± 16.10<br>356.3 ± 17.55                                               |                   |                  |                  |                   |                  |                   |                   |                   |                   |                   | WT: 54<br>KO: 48                                                               | two-tailed t-test                               |                          | ****p<0.0001                       |                                                          | No.                                      |                                                                                                                   |                                                                                 |                                          |                                 |
| Dendritic nodes                         | Supp 1i          | 4.283 ± 0.4731<br>8.042 ± 0.4670                                             |                   |                  |                  |                   |                  |                   |                   |                   |                   |                   | WT: 53<br>KO: 48                                                               | two-tailed t-test                               |                          | ****p<0.0001                       |                                                          | No.                                      |                                                                                                                   |                                                                                 |                                          |                                 |
|                                         |                  | 5.264 ± 0.4721<br>9.083 ± 0.4725                                             |                   |                  |                  |                   |                  |                   |                   |                   |                   |                   | WT: 53<br>KO: 48                                                               | two-tailed t-test                               |                          | ****p<0.0001                       |                                                          | No.                                      |                                                                                                                   |                                                                                 |                                          |                                 |
| Anterior vs. posterior Dendritic length | Supp 1k          | 250.167 ± 25.121<br>336.204 ± 23.556<br>184.581 ± 19.294<br>378.209 ± 25.938 |                   |                  |                  |                   |                  |                   |                   |                   |                   |                   | Anterior, WT: 27<br>Anterior, KO: 25<br>Posterior, WT: 26<br>Posterior, KO: 23 | Two-way                                         | Interaction              | F (1, 97) = 5.2                    | p=0.0248                                                 | Bonferroni<br>* p<0.05<br>****p<0.0001   | No.                                                                                                               |                                                                                 |                                          |                                 |
|                                         |                  | 5.370 ± 0.770<br>7.280 ± 0.607<br>3.154 ± 0.456<br>8.870 ± 0.690             |                   |                  |                  |                   |                  |                   |                   |                   |                   |                   | Anterior, WT: 27<br>Anterior, KO: 25<br>Posterior, WT: 26<br>Posterior, KO: 23 | Two-way                                         | Bregma                   | F (1, 97) = 8.723                  | p=0.0039                                                 |                                          |                                                                                                                   |                                                                                 |                                          |                                 |
|                                         |                  | 6.333 ± 0.770<br>8.320 ± 0.605<br>4.154 ± 0.456<br>9.913 ± 0.708             |                   |                  |                  |                   |                  |                   |                   |                   |                   |                   | Anterior, WT: 27<br>Anterior, KO: 25<br>Posterior, WT: 26<br>Posterior, KO: 23 | Two-way                                         | Genotype                 | F (1, 97) = 0.2498                 | p=0.6184                                                 |                                          |                                                                                                                   |                                                                                 |                                          |                                 |
|                                         |                  |                                                                              |                   |                  |                  |                   |                  |                   |                   |                   |                   |                   | Anterior, WT: 27<br>Anterior, KO: 25<br>Posterior, WT: 26<br>Posterior, KO: 23 | Two-way                                         | Genotype                 | F (1, 97) = 35.13                  | p<0.001                                                  |                                          |                                                                                                                   |                                                                                 |                                          |                                 |
| Anterior vs. posterior Dendritic nodes  | Supp 1l          | 5.370 ± 0.770<br>7.280 ± 0.607<br>3.154 ± 0.456<br>8.870 ± 0.690             |                   |                  |                  |                   |                  |                   |                   |                   |                   |                   | Anterior, WT: 27<br>Anterior, KO: 25<br>Posterior, WT: 26<br>Posterior, KO: 23 | Two-way                                         | Interaction              | F (1, 97) = 8.723                  | p=0.0039                                                 | Bonferroni<br>****p<0.0001               | No.                                                                                                               |                                                                                 |                                          |                                 |
|                                         |                  | 6.333 ± 0.770<br>8.320 ± 0.605<br>4.154 ± 0.456<br>9.913 ± 0.708             |                   |                  |                  |                   |                  |                   |                   |                   |                   |                   | Anterior, WT: 27<br>Anterior, KO: 25<br>Posterior, WT: 26<br>Posterior, KO: 23 | Two-way                                         | Bregma                   | F (1, 97) = 0.2367                 | p=0.6277                                                 |                                          |                                                                                                                   |                                                                                 |                                          |                                 |
|                                         |                  |                                                                              |                   |                  |                  |                   |                  |                   |                   |                   |                   |                   | Anterior, WT: 27<br>Anterior, KO: 25<br>Posterior, WT: 26<br>Posterior, KO: 23 | Two-way                                         | Genotype                 | F (1, 97) = 35.01                  | p<0.0001                                                 |                                          |                                                                                                                   |                                                                                 |                                          |                                 |
|                                         |                  |                                                                              |                   |                  |                  |                   |                  |                   |                   |                   |                   |                   | Anterior, WT: 27<br>Anterior, KO: 25<br>Posterior, WT: 26<br>Posterior, KO: 23 | Two-way                                         | Genotype                 | F (1, 97) = 35.01                  | p<0.0001                                                 |                                          |                                                                                                                   |                                                                                 |                                          |                                 |
| Anterior vs. posterior Dendritic ends   | Supp 1m          | 6.333 ± 0.770<br>8.320 ± 0.605<br>4.154 ± 0.456<br>9.913 ± 0.708             |                   |                  |                  |                   |                  |                   |                   |                   |                   |                   | Anterior, WT: 27<br>Anterior, KO: 25<br>Posterior, WT: 26<br>Posterior, KO: 23 | Two-way                                         | Interaction              | F (1, 97) = 8.475                  | p=0.0045                                                 | Bonferroni<br>****p<0.0001               | No.                                                                                                               |                                                                                 |                                          |                                 |
|                                         |                  |                                                                              |                   |                  |                  |                   |                  |                   |                   |                   |                   |                   | Anterior, WT: 27<br>Anterior, KO: 25<br>Posterior, WT: 26<br>Posterior, KO: 23 | Two-way                                         | Bregma                   | F (1, 97) = 0.2048                 | p=0.6519                                                 |                                          |                                                                                                                   |                                                                                 |                                          |                                 |
|                                         |                  |                                                                              |                   |                  |                  |                   |                  |                   |                   |                   |                   |                   | Anterior, WT: 27<br>Anterior, KO: 25<br>Posterior, WT: 26<br>Posterior, KO: 23 | Two-way                                         | Genotype                 | F (1, 97) = 35.73                  | p<0.0001                                                 |                                          |                                                                                                                   |                                                                                 |                                          |                                 |
|                                         |                  |                                                                              |                   |                  |                  |                   |                  |                   |                   |                   |                   |                   | Anterior, WT: 27<br>Anterior, KO: 25<br>Posterior, WT: 26<br>Posterior, KO: 23 | Two-way                                         | Genotype                 | F (1, 97) = 35.73                  | p<0.0001                                                 |                                          |                                                                                                                   |                                                                                 |                                          |                                 |
| Body mass                               | Supp 3g          | Day 1<br>22.840 ± 0.285<br>22.969 ± 0.352<br>23.058 ± 0.195                  |                   |                  |                  |                   |                  |                   |                   |                   |                   |                   | Day 11<br>23.740 ± 0.366<br>24.023 ± 0.260<br>23.938 ± 0.198                   | Control: 10<br>Susceptible: 13<br>Resilient: 26 | RM Two-way               | Interaction                        | F (2, 46) = 0.2031                                       | p>0.05 (p=0.8169)                        | Bonferroni<br>1 vs 11 days Control p<0.01<br>1 vs 11 days Susceptible p<0.0001<br>1 vs 11 days Resilient p<0.0001 | Yes. 2 independent experiments combined.                                        |                                          |                                 |
|                                         |                  |                                                                              |                   |                  |                  |                   |                  |                   |                   |                   |                   |                   | Control: 10<br>Susceptible: 13<br>Resilient: 26                                | RM Two-way                                      | Day                      | F (1, 46) = 55.84                  | p<0.0001                                                 |                                          |                                                                                                                   |                                                                                 |                                          |                                 |
|                                         |                  |                                                                              |                   |                  |                  |                   |                  |                   |                   |                   |                   |                   | Control: 10<br>Susceptible: 13<br>Resilient: 26                                | RM Two-way                                      | Group                    | F (2, 46) = 0.1871                 | p>0.05 (p=0.8300)                                        |                                          |                                                                                                                   |                                                                                 |                                          |                                 |
|                                         |                  |                                                                              |                   |                  |                  |                   |                  |                   |                   |                   |                   |                   | Control: 10<br>Susceptible: 13<br>Resilient: 26                                | RM Two-way                                      | Subjects (matching)      | F (46, 46) = 5.479                 | p<0.0001                                                 |                                          |                                                                                                                   |                                                                                 |                                          |                                 |
| Adrenal gland weights                   | Supp 3h          | 0.003987 ± 0.0004542<br>0.006702 ± 0.0003575<br>0.005812 ± 0.0003799         |                   |                  |                  |                   |                  |                   |                   |                   |                   |                   | Control: 6<br>Susceptible: 9<br>Resilient: 10                                  | One-way                                         | F (2, 22) = 10.4         | p<0.001 (p=0.0006)                 | Bonferroni<br>*p<0.05<br>***p<0.001                      | Yes. 2 independent experiments combined. |                                                                                                                   |                                                                                 |                                          |                                 |
|                                         |                  | 1.000 ± 0.07165<br>1.248 ± 0.08603<br>1.344 ± 0.1506                         |                   |                  |                  |                   |                  |                   |                   |                   |                   |                   | Control: 9<br>Susceptible: 15<br>Resilient: 7                                  | One-way                                         | F (2, 28) = 2.628        | p>0.05 (p=0.09)                    | Fisher's LSD<br>*p<0.05 (p=0.0421)<br>#p>0.05 (p=0.0771) | Yes. 2 independent experiments combined. |                                                                                                                   |                                                                                 |                                          |                                 |
| Susceptible correlation                 | Supp 3j          |                                                                              |                   |                  |                  |                   |                  |                   |                   |                   |                   |                   | n: 15                                                                          | linear regression                               | Y = -0.00368*X + 1.398   | p>0.05 (p=0.2362)<br>r2=0.1061     |                                                          | Yes. 2 independent experiments combined. |                                                                                                                   |                                                                                 |                                          |                                 |
| Resilient correlation                   | Supp 3k          |                                                                              |                   |                  |                  |                   |                  |                   |                   |                   |                   |                   | n: 7                                                                           | linear regression                               | Y = -0.007032*X + 2.437  | *p<0.05 (p=0.0403)<br>r2=0.6021    |                                                          | Yes. 2 independent experiments combined. |                                                                                                                   |                                                                                 |                                          |                                 |
| IsoA5 level                             | Supp 3l          | 1.000 ± 0.142<br>1.088 ± 0.06577<br>1.153 ± 0.09217                          |                   |                  |                  |                   |                  |                   |                   |                   |                   |                   | Control: 9<br>Susceptible: 15<br>Resilient: 7                                  | One-way                                         | F (2, 28) = 0.01259      | p>0.05 (p=0.9875)                  |                                                          | Yes. 2 independent experiments combined. |                                                                                                                   |                                                                                 |                                          |                                 |
| Susceptible correlation                 | Supp 3m          |                                                                              |                   |                  |                  |                   |                  |                   |                   |                   |                   |                   | n: 15                                                                          | linear regression                               | Y = 0.001931*X + 0.9488  | p>0.05 (p=0.6096)<br>r2=0.02063    |                                                          | Yes. 2 independent experiments combined. |                                                                                                                   |                                                                                 |                                          |                                 |
| Resilient correlation                   | Supp 3n          |                                                                              |                   |                  |                  |                   |                  |                   |                   |                   |                   |                   | n: 7                                                                           | linear regression                               | Y = -2.73e-005*X + 1.018 | p>0.05 (p=0.9946)<br>r2=1.026e-005 |                                                          | Yes. 2 independent experiments combined. |                                                                                                                   |                                                                                 |                                          |                                 |
| TRIP8b level                            | Supp 3o          | 1.000 ± 0.4689<br>1.027 ± 0.3964<br>1.014 ± 0.3747                           |                   |                  |                  |                   |                  |                   |                   |                   |                   |                   | Control: 9<br>Susceptible: 15<br>Resilient: 7                                  | One-way                                         | F (2, 28) = 0.6570       | p>0.05 (p=0.5262)                  |                                                          | Yes. 2 independent experiments combined. |                                                                                                                   |                                                                                 |                                          |                                 |
| Susceptible correlation                 | Supp 3p          |                                                                              |                   |                  |                  |                   |                  |                   |                   |                   |                   |                   | n: 15                                                                          | linear regression                               | Y = -0.0005175*X + 1.109 | p>0.05 (p=0.1960)<br>r2=0.003588   |                                                          | Yes. 2 independent experiments combined. |                                                                                                                   |                                                                                 |                                          |                                 |
| Resilient correlation                   | Supp 3q          |                                                                              |                   |                  |                  |                   |                  |                   |                   |                   |                   |                   | n: 7                                                                           | linear regression                               | Y = -0.003078*X + 1.632  | p>0.05 (p=0.1960)<br>r2=0.308      |                                                          | Yes. 2 independent experiments combined. |                                                                                                                   |                                                                                 |                                          |                                 |





|                                      |             |                                                                                                                                                                                                                                                                                                                                                                                                                                                                                                                                                                                                                                                                                                                                                                                          |                                                                            |                                          |                                |                                                                           |                                                                       |                                                        |                                                |                                                |
|--------------------------------------|-------------|------------------------------------------------------------------------------------------------------------------------------------------------------------------------------------------------------------------------------------------------------------------------------------------------------------------------------------------------------------------------------------------------------------------------------------------------------------------------------------------------------------------------------------------------------------------------------------------------------------------------------------------------------------------------------------------------------------------------------------------------------------------------------------------|----------------------------------------------------------------------------|------------------------------------------|--------------------------------|---------------------------------------------------------------------------|-----------------------------------------------------------------------|--------------------------------------------------------|------------------------------------------------|------------------------------------------------|
|                                      | 8b          | 118.024771841875 ± 4.68605281429836<br>99.6912097815789 ± 6.02840847953546                                                                                                                                                                                                                                                                                                                                                                                                                                                                                                                                                                                                                                                                                                               | CORT/SCRsh: 16<br>CORT/TRIP8bsh:<br>19                                     | Two-way                                  | Virus                          | F (1, 63) =<br>11.45                                                      | p=0.0012                                                              | ***p<0.001                                             | combined.                                      |                                                |
| EPM<br>Frequency<br>(open arms)      | Supp<br>9a  | 12.88 ± 1.132<br>13.75 ± 1.263<br>11.21 ± 0.8327                                                                                                                                                                                                                                                                                                                                                                                                                                                                                                                                                                                                                                                                                                                                         | VEH/SCRsh: 16<br>CORT/SCRsh: 16<br>CORT/TRIP8bsh:<br>19                    | One-way                                  |                                | F (2, 48) =<br>1.521                                                      | p=0.2289                                                              |                                                        | Yes. 3 independent<br>experiments<br>combined. |                                                |
| EPM<br>Duration<br>(open arms)       | Supp<br>9b  | 55.05 ± 5.439<br>58.14 ± 8.183<br>50.33 ± 4.991                                                                                                                                                                                                                                                                                                                                                                                                                                                                                                                                                                                                                                                                                                                                          | VEH/SCRsh: 16<br>CORT/SCRsh: 16<br>CORT/TRIP8bsh:<br>19                    | One-way                                  |                                | F (2, 48) =<br>0.4123                                                     | p=0.6645                                                              |                                                        | Yes. 3 independent<br>experiments<br>combined. |                                                |
| EPM<br>Frequency<br>(closed<br>arms) | Supp<br>9c  | 20.63 ± 1.749<br>21 ± 1.162<br>19.21 ± 1.292                                                                                                                                                                                                                                                                                                                                                                                                                                                                                                                                                                                                                                                                                                                                             | VEH/SCRsh: 16<br>CORT/SCRsh: 16<br>CORT/TRIP8bsh:<br>19                    | One-way                                  |                                | F (2, 48) =<br>0.4673                                                     | p=0.6295                                                              |                                                        | Yes. 3 independent<br>experiments<br>combined. |                                                |
| EPM<br>Duration<br>(closed<br>arms)  | Supp<br>9c  | 187.7 ± 6.049<br>181.3 ± 9.246<br>178.7 ± 10.81                                                                                                                                                                                                                                                                                                                                                                                                                                                                                                                                                                                                                                                                                                                                          | VEH/SCRsh: 16<br>CORT/SCRsh: 16<br>CORT/TRIP8bsh:<br>19                    | One-way                                  |                                | F (2, 48) =<br>0.2527                                                     | p=0.7777                                                              |                                                        | Yes. 3 independent<br>experiments<br>combined. |                                                |
| Splash<br>Frequency                  | Supp<br>9e  | 30.69 ± 3.501<br>26.93 ± 2.331<br>27.78 ± 1.706                                                                                                                                                                                                                                                                                                                                                                                                                                                                                                                                                                                                                                                                                                                                          | VEH/SCRsh: 16<br>CORT/SCRsh: 14<br>CORT/TRIP8bsh:<br>18                    | One-way                                  |                                | F (2, 45) =<br>0.5624                                                     | p=0.5738                                                              |                                                        | Yes. 3 independent<br>experiments<br>combined. |                                                |
| Splash<br>Duration                   | Supp<br>9f  | 193.5 ± 20.24<br>164.1 ± 17.01<br>202.8 ± 11.24                                                                                                                                                                                                                                                                                                                                                                                                                                                                                                                                                                                                                                                                                                                                          | VEH/SCRsh: 16<br>CORT/SCRsh: 14<br>CORT/TRIP8bsh:<br>18                    | One-way                                  |                                | F (2, 45) =<br>1.474                                                      | p=0.2398                                                              |                                                        | Yes. 3 independent<br>experiments<br>combined. |                                                |
| cfos+ cell<br>density<br>(Ent)       | Supp<br>10i | IEnt<br>13.8430071398 ± 2.22142353532157<br>6.2700885928 ± 0.859287488035335                                                                                                                                                                                                                                                                                                                                                                                                                                                                                                                                                                                                                                                                                                             | mEnt<br>73.52736983 ± 23.2051956093183<br>54.6471281375 ± 10.0646426289692 | Both IEnt/mEnt<br>mCherry: 5<br>hM3Dq: 4 | Two-way                        | Interaction<br>Ent<br>subregions<br>virus                                 | F (1, 14) =<br>0.2553<br>F (1, 14) =<br>1.397<br>F (1, 14) =<br>23.32 | p=0.6212<br>p=0.2569<br>p=0.0003                       | Bonferroni<br>*p<0.05<br>**p<0.01              | Yes. 2 independent<br>experiments<br>combined. |
| cfos+ cell<br>Bregma                 | Supp<br>10j | -0.82 -1.12 -1.42 -1.72 -2.02 -2.32 -2.62 -2.92 -3.22 -3.52 -3.82 -4.12 -4.42 -4.72 -5.02<br>9 ± 0.000 ± 0.000 2.9664793 17.6 ± 2.4 0.8602325 1.9595917 2.50195620 4.1036569 3.6110940 2.8178005 3.4842952<br>9493626 26704263 9422654 063936 0573664 1705356 6072107 7803607 17 ± 13.4 ± 9.4 ± 1.6 ± 0.000<br>0.000 ± 0.000 0.8717797 3.2954514 0.9435524 39.4 ± 2.6 7.25872102 4.8744230 6.5861047 3.1208973 4.3831785 5801540 7398198 7793912 2988312 ± 1<br>9.6 ± 19.6 ± 36.8 ± 48.4 ± 41.8 ± 35.8 ± 20.8 ± 23 ± 30.2 ± 22.8 ± 15.8 ± 0.4 ± 0.000<br>0.000 ± 0.000 0.8717797 3.2954514 0.9435524 39.4 ± 2.6 7.25872102 4.8744230 6.5861047 3.1208973 4.3831785 7712930 7038162 3659514 3475609 ± 1 ± 1<br>88708135 1065682 1532493 261069 4278158 4946921 0686545 2729776 8 71 95 39 | mCherry: 5<br>hM3Dq: 5                                                     | Two-way                                  | Interaction<br>Bregma<br>Virus | F (14, 120) =<br>2.087<br>F (14, 120) =<br>21.72<br>F (1, 120) =<br>53.28 | p=0.0170<br>p<0.0001<br>p<0.0001                                      | Fisher's LSD<br>**p<0.01<br>***p<0.001<br>****p<0.0001 | Yes. 2 independent<br>experiments<br>combined. |                                                |
| EEG_Day<br>(Pre-CNO)                 | Supp<br>11e | Delta Theta Alpha Beta Gamma<br>0.450414002 ± 0.20231102075 ± 0.1228955395 ± 0.0774707285 ± 0.05970658775 ±<br>0.028473716743004 0.00526809576757308 0.0140295713226281 0.00410525744148152 0.00666068641006<br>3<br>0.40848298925 ± 0.18654270725 ± 0.108499374 ± 0.086444102 ± 0.06152485725 ±<br>0.0283028732433249 0.00778074330018127 0.00250330049328292 0.00958501161240765 0.0106857366907932                                                                                                                                                                                                                                                                                                                                                                                    | mCherry: 4<br>hM3Dq: 4                                                     | Two-way                                  | Interaction<br>bands<br>Virus  | F (4, 30) =<br>0.9372<br>F (4, 30) =<br>219.2<br>F (1, 30) =<br>1.817     | p=0.4559<br>p<0.0001<br>p=0.1878                                      |                                                        | Yes. 2 independent<br>experiments<br>combined. |                                                |
| EEG_Day<br>(Post-CNO)                | Supp<br>11f | Delta Theta Alpha Beta Gamma<br>0.44766052675 ± 0.209650387275 ± 0.1153227695 ± 0.07892092975 ± 0.06005660225 ±<br>0.0172764015393249 0.00630687359840694 0.00600830092292557 0.004528688693444 0.0030738092910463<br>0.42238062375 ± 0.186920898 ± 0.1034564675 ± 0.07803589475 ± 0.05405130725 ±<br>0.0302678080681449 0.01003924927192882 0.00796345034071587 0.0114663691852845 0.0104057283895814                                                                                                                                                                                                                                                                                                                                                                                   | mCherry: 4<br>hM3Dq: 4                                                     | Two-way                                  | Interaction<br>bands<br>Virus  | F (4, 30) =<br>0.3188<br>F (4, 30) =<br>276.6<br>F (1, 30) =<br>2.193     | p=0.8632<br>p<0.0001<br>p=0.1490                                      |                                                        | Yes. 2 independent<br>experiments<br>combined. |                                                |
| EEG_Night<br>(Post-CNO)              | Supp<br>11g | Delta Theta Alpha Beta Gamma<br>0.43833400275 ± 0.200400754 ± 0.10664645725 ± 0.083813766 ± 0.06603167075 ±<br>0.0162029488709943 0.0174702499159458 0.00285277670003575 0.00517257836826144 0.0122055309981947<br>0.41890417575 ± 0.17775036075 ± 0.1057029185 ± 0.08411452 ± 0.07086175275 ±<br>0.039918486734102 0.0118276713159797 0.00681036689734467 0.0123975463569172 0.0163131603933876                                                                                                                                                                                                                                                                                                                                                                                         | mCherry: 4<br>hM3Dq: 4                                                     | Two-way                                  | Interaction<br>bands<br>Virus  | F (4, 30) =<br>0.2888<br>F (4, 30) =<br>163.6<br>F (1, 30) =<br>0.5285    | p=0.8829<br>p<0.0001<br>P=0.4729                                      |                                                        | Yes. 2 independent<br>experiments<br>combined. |                                                |
